1 **Title:**

2 M-Risk: A framework for assessing global fisheries management efficacy of sharks, rays, and  
3 chimaeras

4

5 **Alternate titles:**

6 1. M-Risk: An updated framework to assess efficacy of fisheries management of sharks,  
7 rays, and chimaeras based on intrinsic sensitivity

8 2. Developing a framework for rapid assessment of global fisheries management of  
9 sharks, rays, and chimaeras

10

11 **Running title:**

12 M-Risk shark fisheries assessments

13

14 **Authors:**

15 C. Samantha Sherman\* <sup>1,2</sup>

16 Glenn Sant<sup>2,3</sup>

17 Colin A. Simpfendorfer<sup>4</sup>

18 Eric D. Digel<sup>1</sup>

19 Patrick Zubick<sup>1</sup>

20 Grant Johnson<sup>5</sup>

21 Michael Usher<sup>5</sup>

22 Nicholas K. Dulvy<sup>1</sup>

23

24 **Corresponding author:**

25 C. Samantha Sherman

26 E-mail: sammsherman27@gmail.com

27

28 **Affiliations:**

29 1. Earth to Oceans Research Group, Department of Biological Sciences, Simon Fraser  
30 University, Burnaby, British Columbia, Canada

31 2. TRAFFIC International, Cambridge, U.K.

32 3. Australian National Centre for Ocean Resources and Security, University of  
33 Wollongong, NSW, Australia

34 4. Institute of Marine and Antarctic Studies, University of Tasmania, Hobart, Tasmania,  
35 Australia

36 5. Department of Industry, Tourism and Trade, Fisheries Branch, Northern Territory  
37 Government, Darwin, Northern Territory, Australia

38

39

40

41

42

43

44

45

46

47 **ABSTRACT**

48 Fisheries management is essential to guarantee sustainable capture of target species and  
49 avoid undesirable declines of incidentally captured species. A key challenge is halting and  
50 reversing declines of shark and ray species, and specifically assessing the degree to which  
51 management is sufficient to avoid declines in relatively data-poor fisheries. While ecological  
52 risk analyses focus on intrinsic 'productivity' and extrinsic 'susceptibility', one would ideally  
53 consider the influence of 'fisheries management'. Currently, there is no single management  
54 evaluation that can be applied to a combination of fishery types at the scale of individual  
55 country or Regional Fisheries Management Organisations (RFMOs). Here, we outline a  
56 management risk (M-Risk) framework for sharks, rays, and chimaeras used to evaluate  
57 species' risk to overfishing resulting from ineffective management. We illustrate our  
58 approach with application to one country (Ecuador) and RFMO (Inter-American Tropical  
59 Tuna Commission) and illustrate the variation in scores among species. We found that while  
60 both management units assessed had similar overall scores, the scores for individual  
61 attributes varied. Ecuador scored higher in reporting-related attributes, while the IATTC  
62 scored higher in attributes related to data collection and use. We evaluated whether  
63 management of individual species was sufficient for their relative sensitivity by combining  
64 the management risk score for each species with their intrinsic sensitivity to determine a  
65 final M-Risk score. This framework can be applied to determine which species face the  
66 greatest risk of overfishing and be used by fisheries managers to identify effective  
67 management policies by replicating regulations from countries with lower risk scores.

68

69

70 **KEYWORDS**

71 Data-poor fisheries, ecological risk assessment, elasmobranch, marine conservation,  
72 resource management, socio-ecological resilience

73

74

75

76

77

78

|     |                                                                      |
|-----|----------------------------------------------------------------------|
| 79  | <b>1. INTRODUCTION</b>                                               |
| 80  | <b>2. DEVELOPING THE NEW M-RISK FRAMEWORK</b>                        |
| 81  | <b>2.1 Unit of Assessment</b>                                        |
| 82  | <b>2.2 Species Selection</b>                                         |
| 83  | <b>2.3 Management Assessment Framework</b>                           |
| 84  | <b>2.3.1 Management System</b>                                       |
| 85  | <b>2.3.2 Fishing Practices and Catch</b>                             |
| 86  | <b>2.3.3 Compliance, Monitoring, and Enforcement</b>                 |
| 87  | <b>2.3.4 Country Attributes</b>                                      |
| 88  | <b>2.3.5 RFMO Attributes</b>                                         |
| 89  | <b>2.4 Scoring of Attributes</b>                                     |
| 90  | <b>2.5 Measuring Intrinsic Sensitivity</b>                           |
| 91  | <b>3. APPLYING THE M-RISK FRAMEWORK</b>                              |
| 92  | <b>3.1 Case Studies: Country and RFMO for Management Assessments</b> |
| 93  | <b>3.1.1 Ecuador</b>                                                 |
| 94  | <b>3.1.1.1 Information Sources</b>                                   |
| 95  | <b>3.1.1.2 Management Assessment Results</b>                         |
| 96  | <b>3.1.1.3 Management Assessment Discussion</b>                      |
| 97  | <b>3.1.2 IATTC</b>                                                   |
| 98  | <b>3.1.2.1 Information Sources</b>                                   |
| 99  | <b>3.1.2.2 Management Assessment Results</b>                         |
| 100 | <b>3.1.2.3 Management Assessment Discussion</b>                      |
| 101 | <b>3.2 Final M-Risk Scores</b>                                       |
| 102 | <b>4. DISCUSSION</b>                                                 |
| 103 | <b>ACKNOWLEDGEMENTS</b>                                              |
| 104 | <b>CONFLICT OF INTEREST</b>                                          |
| 105 | <b>AUTHOR CONTRIBUTION</b>                                           |
| 106 | <b>DATA AVAILABILITY STATEMENT</b>                                   |
| 107 | <b>REFERENCES</b>                                                    |
| 108 |                                                                      |
| 109 |                                                                      |
| 110 |                                                                      |

## 111 1. INTRODUCTION

112 Catch in marine fisheries globally has decreased since the mid-1990s despite increasing  
113 effort (FAO, 2020; Pauly, Zeller, & Palomares, 2021; Rousseau, Watson, Blanchard, & Fulton,  
114 2019). Ensuring long-term sustainable fisheries requires management not only of target  
115 species but also of all other species affected by the fishery (Hilborn et al., 2003). However,  
116 halting biodiversity loss and ecosystem management ideally requires knowledge of the  
117 status and fishing mortality associated with all species taken in the fishery. Globally, at least  
118 13,060 different species are caught (FAO, 2021), leaving over 97% of species without a stock  
119 assessment – there are only 957 stock assessments for 360 unique species (RAM Legacy  
120 Stock Assessment Database, 2021). For such data-rich stock assessed populations and  
121 species, we know their levels of exploitation and their sustainable fishing mortality levels  
122 (RAM Legacy Stock Assessment Database, 2021; Ricard, Minto, Jensen, & Baum, 2012). But  
123 for data-poor species, how do we determine their status? Much of our understanding on  
124 data-poor species' catch is based on landings data reported to the Food and Agriculture  
125 Organization of the United Nations (FAO)(Froese, Zeller, Kleisner, & Pauly, 2012). Data-poor  
126 species comprise >80% of global catch and almost two-thirds of species are overexploited  
127 (Costello et al., 2012; Guan, Chen, Boenish, Jin, & Shan, 2020). However, landings data are  
128 not consistent or reliable globally, particularly in countries with many landing sites and/or  
129 high levels of artisanal catch, particularly for sharks and their relatives (Khan et al., 2020;  
130 Okes & Sant, 2022; Ruano-Chamorro, Subida, & Fernández, 2017). Additionally, the catches  
131 of data-poor species, if characterised, are often reported as aggregates; grouped together  
132 by genus, family, or higher, giving little information on the catch of individual species  
133 (Cashion, Bailly, & Pauly, 2019; FAO, 2019). The portfolio effects of these aggregate catch  
134 statistics mask serial depletions, cryptic declines, and local extinctions (Dulvy, Metcalfe,  
135 Glanville, Pawson, & Reynolds, 2000; Lawson et al., 2020; Schindler et al., 2010). Many  
136 methods have been developed to assess data-poor species and stocks, which require, *inter*  
137 *alia*, different data inputs such as catches (Anderson, Branch, Ricard, & Lotze, 2012), length  
138 compositions (Cope & Punt, 2009; Froese, 2004), age-at-maturity (Brooks, Powers, & Cortés,  
139 2010; Cope, 2013), gear selectivity (Le Quesne & Jennings, 2012). However, all have major  
140 assumptions and biases associated with the outputs (Chrysafi & Kuparinen, 2015). There  
141 remains a need for a rapid risk assessment technique, when detailed stock assessments are  
142 not possible, at the scale of countries and RFMOs.

143

144 When assessing the risk of a species within a fishery, the terminology used throughout the  
145 risk assessment literature is inconsistent. Therefore, we have used the most common terms  
146 and defined them where appropriate. Here, we use the framing of Vulnerability as derived  
147 from the social science, hazard assessment, and climate risk literature (Turner II et al.,  
148 2003), and increasingly used in biological risk assessment (Allison et al., 2009; Williams,  
149 Shoo, Isaac, Hoffmann, & Langham, 2008). Vulnerability is typically considered to be the  
150 interaction of intrinsic sensitivity (biological traits that inform extinction risk) with exposure  
151 (the overlap between a threat and the species' range) to a threatening process (i.e., fishing  
152 or climate change). Broadly, vulnerability can be considered to be the inverse of ecological  
153 resilience (Allison et al., 2009). Taken together, the Potential Impact (sensitivity x exposure)  
154 can be offset either by phenotypical plasticity or genotypic evolution when considering a  
155 species, or through building Adaptive Capacity of the human system, which can be  
156 strengthened through management or disaster planning and preparedness (Allen Consulting  
157 Group, 2005; Allison et al., 2009; Dulvy et al., 2011). For example, fishers in Kenya increased  
158 their Adaptive Capacity to climate change by increasing community infrastructure and  
159 access to credit (Cinner et al., 2015). Ecological risk assessments can take several different  
160 forms, however, all measure similar aspects of risk such that a species' vulnerability ( $V$ ) is a  
161 function of their intrinsic life history sensitivity (Intrinsic Sensitivity), Exposure to fishing  
162 pressure, say as inferred from the spatial and depth overlap with the species' distribution,  
163 and the species' catchability in the fishing gears (Hobday et al., 2011; Walker et al., 2021).  
164 All this Potential Impact can be offset by Adaptive Capacity:

$$\text{Equation 1: } \textit{Vulnerability} = f\left(\frac{\textit{Intrinsic Sensitivity} * \textit{Exposure}}{\textit{Adaptive Capacity}}\right)$$

165 This generic risk assessment framework has been pruned down to focus only on the  
166 Potential Impact, specifically the interplay of sensitivity and exposure. This is most  
167 commonly treated by Productivity Susceptibility Assessments (PSA), a type of ecological risk  
168 analysis which has been typically applied to single fishery to compare the relative risk of the  
169 full range incidentally captured species (Fletcher, 2005; Hobday et al., 2011; Micheli, De Leo,  
170 Butner, Martone, & Shester, 2014) (**Figure 1**). This approach can be applied to data-poor  
171 fisheries and in highly diverse systems with taxonomically diverse species in the incidental

172 catch, such as in an Australian Prawn Trawl Fishery (Astles et al., 2006; Stobutzki, Miller, &  
173 Brewer, 2001).

174

175 As with all risk assessments, there are trade-offs to achieve a result that best informs the  
176 goals of the assessment. Other risk frameworks, like PSAs, tend to focus on a specific  
177 assessment unit comprised of a single fishery, set of species, or gear type, or combination  
178 (Astles et al., 2006; Cortés, Brooks, & Shertzer, 2015; Zhou, Milton, & Fry, 2012). PSA  
179 customization allows for a deeper, more nuanced assessment within a single assessment  
180 unit. However, specificity of a PSA makes comparisons difficult to other PSAs with different  
181 criteria or scoring. Thus, the need for a method that can be used across all fishery types  
182 including different gear types, target species, and data availability at the scale of countries  
183 and RFMOs. Similarly, while a risk assessment can be used to rank the species at risk within  
184 a fishery, it does not consider the degree to which the Potential Impact is or can be offset by  
185 the existence of some form of management (Turner II et al., 2003) (**Figure 1**).

186

187 To incorporate management into risk assessments, a rapid management risk assessment  
188 (M-Risk) was proposed for shark species and tested for species with high intrinsic sensitivity,  
189 many of which are CITES listed (Lack, Sant, Burgener, & Okes, 2014). The results showed  
190 variation in management efficacy despite protections that should have resulted from  
191 compliance with CITES listings. While the original risk framework was fit for the purpose of  
192 threatened species, it was not necessarily optimised for species caught and traded in high  
193 volumes. M-Risk considers that vulnerability ( $V$ ) is a function of a species' intrinsic sensitivity  
194 ( $IS$ ), exposure to fishing pressure ( $E$ ), and Management, substituted for Adaptive Capacity  
195 from equation 1:

$$\text{Equation 2: } Vulnerability = f\left(\frac{Intrinsic\ Sensitivity * Exposure}{Management}\right)$$

196

197 We note that while management does not influence intrinsic susceptibility *per se* it does  
198 influence the interaction of intrinsic sensitivity and exposure *inter alia* by managing the  
199 availability, encounterability, selectivity, and post-release mortality of species through  
200 various technical approaches (Hobday et al., 2011).

201

202 Sharks, rays, and chimaeras (class: Chondrichthyes; >1,199 species, hereafter “sharks and  
203 rays”) present a challenge for fisheries managers as they are frequently retained as  
204 secondary catch or discarded as incidental catch (Stevens, Bonfil, Dulvy, & Walker, 2000).  
205 Overfishing, both targeted and incidental, has caused populations of sharks and rays to  
206 decline dramatically over the past 50 years, leading to a high rate of elevated extinction risk  
207 (Dulvy et al., 2021; Pacoureau et al., 2021). As they are commonly considered unavoidable  
208 incidental or secondary catch, sharks and rays are frequently treated as unimportant or  
209 unavoidable in a management context. Therefore, sharks and rays are an ideal candidate  
210 group for an M-Risk assessment. Many sharks and rays are longer-lived species, with low  
211 intrinsic rates of population increase, and cannot be fished at the same rate as most  
212 teleosts, despite often being caught alongside them (Brander, 1981; Musick, Burgess,  
213 Cailliet, Camhi, & Fordham, 2000; Myers & Worm, 2005; Pardo, Cooper, Reynolds, & Dulvy,  
214 2018; Stevens, Walker, & Simpfendorfer, 1997). Fisheries management of sharks and rays is  
215 further complicated because of the diversity of species, gears used, jurisdictions in which  
216 they are caught (Dulvy et al., 2017; Simpfendorfer & Dulvy, 2017), and their complex  
217 migration patterns that transit the waters of multiple countries, which increases their  
218 exposure in multiple fisheries and cumulative impacts of being caught throughout their  
219 migration routes (Dragičević, Dulčić, & Capapé, 2009; Heupel et al., 2015; Sellas et al., 2015).  
220 Despite the high intrinsic sensitivity of many species, sustainable shark and ray fisheries are  
221 possible if assessment and management is adequate. There are 39 sustainably fished  
222 populations of 33 species of sharks and rays around the globe (Simpfendorfer & Dulvy,  
223 2017) and signs of recovery in US and EU managed populations (Amelot et al., 2021;  
224 Peterson et al., 2017). Sustainable shark and ray fisheries all have common characteristics  
225 that distinguish them from unsustainable shark and ray fisheries. These centre on fishing  
226 mortality to sustainable levels through limits on catch and/ or effort, supported by robust  
227 legislation, well-enforced regulations, and science-based advisory processes (Simpfendorfer  
228 & Dulvy, 2017; Woodhams, Peddemors, Braccini, Victorian Fisheries Authority, & Lyle,  
229 2021).

230

231 Here, we provide a revised set of attributes based on the original M-Risk framework (Lack et  
232 al. 2014), for application to any shark or ray species in any fishery to rapidly and objectively  
233 assess management efficacy in a comparable consistent manner at country and RFMO

234 scales (**Figure 1**). First, we illustrate the revised M-Risk framework with two case studies:  
235 one for all species in a country (Ecuador, 29 species) and one for 24 species in a Regional  
236 Fisheries Management Organisation (RFMO) – the Inter-American Tropical Tuna  
237 Commission (IATTC). Second, once assessments were completed, management scores for  
238 each species were combined with their intrinsic risk scores to attain a final M-Risk score per  
239 species in each management unit. Third, we discuss the methodology and initial  
240 assessments with the goal of completing assessments for a larger suite of management  
241 units globally, hence species mentioned includes some not assessed in this paper. These  
242 scores are intended for two anticipated uses: (1) by fisheries managers so that  
243 improvements can be made specifically for species that are undermanaged relative to their  
244 intrinsic sensitivity or for overall fisheries improvements (risk management) and (2) for  
245 comparative analysis of the state of the world's shark and ray fisheries.

246

## 247 **2. DEVELOPING THE NEW M-RISK FRAMEWORK**

### 248 **2.1 Unit of Assessment – country and RFMO**

249 When considering exploited marine species and their management, there are two levels at  
250 which an assessment can be completed: stock or fishery. First, a stock is usually a political  
251 construct that consists of a demographically isolated portion of the global population that is  
252 often managed as a single unit (Begg & Waldman, 1999). Where a single stock is  
253 widespread, the fisheries may be managed separately by different jurisdictions. This can  
254 complicate the risk assessment of the stock, as it may not be clear which management unit  
255 is responsible for the species' status if it is not uniformly co-managed across jurisdictions,  
256 and the assessment must factor in the effects of multiple sectors and the cumulative  
257 impacts on the status of the stock (Urquhart, Acott, Symes, & Zhao, 2014). For example, the  
258 Winter Skate (*Leucoraja ocellata*) occurs in both Canadian and USA waters; however, the  
259 population trend in the USA is increasing, while the population trend in Canadian waters is  
260 decreasing (Kulka et al., 2020). The discrepancy may be due to differing management focus  
261 and effectiveness of the fisheries in each country (Kulka et al., 2020). Second, in our case, a  
262 fishery is defined by its management such that each separate fishery is managed by a single  
263 jurisdiction that regulates the laws of operation within the spatial extent of the fishery.

264



265 We are applying M-Risk at two scales (country and RFMO), hereafter referred to as  
266 “Management Units”. Within a single country (Ecuador, here), we selected a representative  
267 fishery based on which one had the highest level of catch (retained and discarded) with the  
268 species under assessment. Each fishery will be assessed as a single unit, not considering if  
269 the species is caught in other fisheries within or outside of the management unit, or the  
270 cumulative impacts of multiple fisheries contributing to fishing mortality of the species. High  
271 seas fishing was not considered when assessing countries, only fishing occurring within their  
272 respective Exclusive Economic Zones (EEZs), as high seas management should be picked up  
273 in RFMO assessments. Vessels from member countries of each RFMO are obligated to  
274 adhere to the RFMO regulations when operating in those fishery grounds. Countries may  
275 apply stricter regulations to their flagged vessels fishing within RFMO grounds. However, we  
276 are applying our criteria only to legislation that is applicable for **all** member countries of the  
277 RFMO, as this is the minimum standard in those fishing grounds.

278

## 279 **2.2 Species Selection**

280 Sharks and rays are commonly caught and traded globally (Dent & Clarke, 2015). As there  
281 are currently over 1,200 described species (Ebert, Dando, & Fowler, 2021; Last et al., 2016),  
282 we curated a list consisting of the most frequently traded species worldwide, based on four  
283 sources: (i) catches reported to the Food and Agriculture Organization of the United Nations  
284 (FAO) (FAO, 2019), (ii) reconstructed catches from the Sea Around Us Project (Pauly & Zeller,  
285 2016), (iii) species listed on the Appendices of the Convention on International Trade in  
286 Endangered Species of Wild Fauna and Flora (CITES) (<https://cites.org>), and (iv) species  
287 listed on the Appendices of the Convention on the Conservation of Migratory Species of  
288 Wild Animals (CMS) (<https://www.cms.int>). Additionally, we included species or groups that  
289 are caught in high abundances but usually identified at a higher taxonomic level, such as  
290 cowtail rays (*Pastinachus* spp.) in the Indo-Pacific. The final list for the full M-Risk project  
291 included 69 sharks identified to species level apart from one genus (*Etmopterus*;  $n = 38$ ), 27  
292 rays identified to either species level or a ray group (e.g., eagle rays) (16 species; 11 groups,  
293  $n = 80$ ), and 6 ghost shark species for a total of 102 species or groups (**Data S1**). The ray  
294 groups included different levels of taxonomic resolution for species that were difficult to  
295 distinguish, have similar life history characteristics, distribution, and human use, or are  
296 taxonomically unresolved or may comprise a species complex (e.g., maskrays – *Neotrygon*

297 spp.). The number of species assessed in this paper was lower, at 36 species (30 sharks, 2  
298 ray species, and 4 ray groups). However, the larger suite of 102 species is referred to here  
299 because intrinsic risk scores of the 36 species considered here are expressed relative to the  
300 entire 102 species of the project. Assessments were completed for each species separately,  
301 except for the groups, for which a single assessment was completed for the whole group.  
302 The combined assessments were necessary, as there are very limited species-specific data  
303 or management system details within the groups. All species that have a distribution  
304 overlapping with the management unit's spatial grounds are assessed for that management  
305 unit. Final M-Risk scores were calculated at the species level, as intrinsic sensitivity of  
306 species within each group differed.

307

### 308 **2.3 Management Assessment Framework**

309 We devised 21 measurable attributes to assess the degree to which management is  
310 adequate to prevent sharks and rays from being overexploited. These attributes were  
311 chosen based on regulations that (1) enabled understanding, and (2) curbed fishing  
312 mortality on the focal shark and ray species and was informed by previous work on  
313 sustainable shark fisheries (Davidson, Krawchuk, & Dulvy, 2015; FAO, 1999; Melnychuk,  
314 Peterson, Elliott, & Hilborn, 2017). Some attributes were considered but could not be  
315 included due to data paucity. For example, total catch of each species is not available in  
316 most fisheries and, therefore, was not included as an attribute at present but could be  
317 considered as more of these data become available.

318

319 Twenty-one attributes were created comprised of three common classes and two classes  
320 related to the spatial unit of analysis (**Table 1**):

321 (i) the management system (5 attributes),

322 (ii) fishing practices and catch (5 attributes),

323 (iii) compliance and enforcement (5 attributes),

324 and an additional category considered the management unit and how it relates to other  
325 management units which consisted of attributes either specific to:

326 (iv) country (4 attributes), OR

327 (v) RFMO (2 attributes).

328 Therefore, countries were scored for 19 of the attributes and RFMOs are scored for 17 of  
329 the attributes. These numbers were different as there were more aspects of a country that  
330 could be assessed. Next, we unpack each of the five attribute classes.

331

### 332 **2.3.1 Management System**

333 The management system consists of a regulatory body, fishery permits, and assessments to  
334 understand the potential risk the fishery poses. Without such foundational management in  
335 place, it is unlikely the fishery will have any more sophisticated regulations or any capacity  
336 to enforce regulations in place. These attributes are intended to increase our understanding  
337 of the capability of management for improvement. Having basic management, such as a  
338 permitting system, enables fisheries managers to have records of all vessels operating in the  
339 fishery, which can enable the setting of limits on catches or effort. For management units  
340 that receive low scores in the 'management system' attributes, we would recommend the  
341 government allocates resources to strengthen the capacity of the fishery to manage the  
342 resource as a first step to introducing intricate regulations that are more likely to curb  
343 fishing mortality and increase sustainability.

344

### 345 **2.3.2 Fishing Practices and Catch**

346 Fishing practices and catch include landing limits, shark finning, post-release survival, and  
347 closures. Management of at-sea fishing operations is difficult due to the size of the area in  
348 which fishing occurs and the costs associated with patrolling large spaces (Rowlands, Brown,  
349 Soule, Boluda, & Rogers, 2019). Ideally, fisheries managers would know exactly the number  
350 of each species caught and their fate post-release (if released), in addition to having spatial  
351 and/or seasonal closures in place for at-risk species at sensitive times or locations. Simply,  
352 having regulations in place that affect at-sea operations but can be measured or enforced  
353 upon landing are the most effective, as these do not require boarding of vessels at-sea. For  
354 example, the requirement that sharks are landed with fins naturally attached is something  
355 that can be checked upon landing the catch (Fowler & Séret, 2010). Similarly, the existence  
356 of spatial and temporal closures can be monitored through use of Vessel Monitoring  
357 Systems (VMS) that can be checked from land (Enguehard, Devillers, & Hoerber, 2013). For  
358 management units with low scores in the 'fishing practices and catch' attributes, we would

359 recommend the inclusion of regulations that decrease fishing mortality on intrinsically  
360 sensitive species, like sharks and rays.

361

### 362 **2.3.3 Compliance, Monitoring, and Enforcement**

363 Compliance, monitoring, and enforcement consists of reporting catch, ensuring reports are  
364 valid, having enforcement in place for violations, and monitoring of illegal, unregulated, and  
365 unreported fishing (IUU). Compliance, meaning operating within the established legislation,  
366 often requires fisher agreement. Fishers are more likely to comply with legislation (1) when  
367 they understand regulations are in place for their own interest by increasing sustainability,  
368 (2) through feeling obligated to comply, and (3) through enforcement measures that may  
369 decrease their profitability if non-compliance is discovered (Hønneland, 1999). Additionally,  
370 fishers with a better relationship and trust with the management authority are more likely  
371 to comply with regulations (Hauck, 2008). In an ideal world, fishers would have 100%  
372 compliance with the regulations, however, this is not realistic, and therefore, must be  
373 monitored and enforced (Price et al., 2016). The attributes within this class were designed  
374 to assess how the quantity and composition of the catch is validated and what measures are  
375 in place to ensure there is high compliance within the fishery. Similarly, we include an  
376 attribute considering how IUU fishing is accounted for through management measures. As  
377 IUU fishing has been estimated to be up to 26 million tonnes per year of the global catch,  
378 this can have a significant impact on fishing mortality and must be accounted for in  
379 assessing and managing the fishery (Agnew et al., 2009). The attributes within this group  
380 require more nuanced regulations, therefore, management units with higher scores in this  
381 category are expected to have higher scores in the previous categories as well. For  
382 management units with lower scores in the 'compliance, monitoring, and enforcement'  
383 attributes, we would recommend allocating funding to increase fishery officer coverage,  
384 including at landing ports to observe unloading and in office to monitor vessel operations.

385

### 386 **2.3.4 Country Attributes**

387 Country attributes include whether the country is involved in international agreements, how  
388 effective their National Plan of Action for Sharks (NPOA-Sharks) is, if one exists, and the  
389 amount given in subsidies. These attributes deal with the relationship of the country to the  
390 rest of the world through the engagement with international treaties and agreements like

391 CITES and CMS. The scores in this group are indicative of how managers in each country  
392 consider preservation of at-risk species. For countries with lower scores in the country  
393 attributes, we would recommend improving or drafting an NPOA-Sharks, and reallocating  
394 subsidy funding to more beneficial outcomes like marine protected area implementation  
395 and management as opposed to tax exemptions and fuel subsidies.

396

### 397 **2.3.5 RFMO Attributes**

398 RFMO attributes include whether membership parties are involved in international treaties  
399 and agreements like CITES and CMS, and their progress on ecosystem-based fisheries  
400 management (EBFM). Similar to the country attribute, membership in CITES and CMS shows  
401 willingness to protect species-at-risk and EBFM progress shows the care of the RFMO for the  
402 overall ecosystem in which they are fishing. For RFMOs with lower scores in these  
403 attributes, we would recommend improving their progress towards EBFM and encouraging  
404 member countries to participate in CITES and CMS, without species reservations.

405

### 406 **2.4 Scoring of Attributes**

407 Each attribute was scored individually based on detailed value statements (e.g., **Table 2**),  
408 such that a higher score indicated a higher likelihood of achieving a sustainable outcome for  
409 the species (full value statements available in **Supplementary Information 1**). Our scoring of  
410 attributes assigned the highest scores to the ideal 'counterfactual' situation (Juan-Jordá,  
411 Murua, Arrizabalaga, Dulvy, & Restrepo, 2018). We chose narrow ranges for ordinal scoring,  
412 (either 0-3, 0-4, or 0-5, similar to a Likert scale) and scored attributes against the value  
413 statements found in **supplementary information 1**. In cases where information was absent,  
414 precautionary scores of zero were given (Hobday et al., 2011). In some cases, an attribute  
415 was not applicable to the species being assessed (i.e., an attribute determining post-release  
416 survival is not relevant to a species that is always retained). When this occurred, the  
417 attribute would simply not be scored and left out of the final calculations. The narrow range  
418 of scores ensured consistency of scoring over time, across jurisdictions, and across  
419 assessors. As such the range of uncertainty in scoring can only be low. We did consider  
420 scoring over a wider scale, say 0-9, which would have allowed assigning a range instead of a  
421 single score, and, therefore, allow incorporation and propagation of uncertainty, say with a  
422 Fuzzy Logic or Bayesian approach. However, we deemed that it would be much more

423 difficult to ensure consistent scoring across assessors and jurisdictions. For countries, nine  
424 of the attributes were universal (U) for the entire fishery and the remaining ten attributes  
425 were specific to each species being assessed (SP). For RFMOs, seven were universal and ten  
426 were species-specific (**Table 1**). The final management score, when all attributes were  
427 assessed, was calculated based on points scored out of potential points available and  
428 converted to a percentage towards ideal management.

429

430 For RFMOs, scores were assigned based on legislation agreed to by all member countries.  
431 Some countries may have additional requirements, however, these were not considered for  
432 the RFMO score because we took a precautionary approach and assessed based on the  
433 minimum standards for all vessels operating within a fishery. The highest possible score  
434 (100%) indicates ideal management for sharks and rays; therefore, final management scores  
435 for each management unit indicated their progress towards the ideal. Management scores  
436 are intended to be used for comparisons between management units and species, and are  
437 of little value alone as no fisheries are expected to achieve a score of 100%. Comparisons  
438 can be made (1) between different species within a single management unit, (2) the average  
439 score between different management units, (3) between a single species in each  
440 management unit that it has been assessed, and (4) between different taxonomic groups  
441 within or across different management units.

442

## 443 **2.5 Representing Intrinsic Sensitivity**

444 To understand Vulnerability (equation 2) we calculate the intrinsic sensitivity of a species to  
445 overexploitation in addition to the management risk assessment. Factors that contribute to  
446 a greater likelihood of population decline or higher intrinsic sensitivity for marine species  
447 include large body size and a slow speed of life (e.g. slow somatic growth rate, late age-at-  
448 maturity, or long generation length) (Juan-Jordá, Mosqueira, Freire, & Dulvy, 2015; Lee &  
449 Jetz, 2011; Reynolds, Dulvy, Goodwin, & Hutchings, 2005).

450

451 Elasmobranchs as a group are characterised as having long life spans, late age-at-maturity,  
452 and low fecundity (Cortés, 2000; Field, Meekan, Buckworth, & Bradshaw, 2009), and  
453 consequently they have a range of intrinsic sensitivities (Pardo, Kindsvater, Reynolds, &  
454 Dulvy, 2016). However, within the group there are extremes for all characteristics. For

455 example, the Whale Shark (*Rhincodon typus*) is the largest fish species in the world,  
456 attaining a maximum body length of up to 20 m (Chen, Liu, & Joung, 1997). On the other  
457 end of the scale, the Dwarf Lanternshark (*Etmopterus perryi*) attains a maximum body  
458 length of just 21 cm, approximately one hundredth the maximum body length of Whale  
459 Shark (Ebert et al., 2021). Relating to the speed of life, Rigby and Simpfendorfer (2015)  
460 discuss the high intrinsic sensitivity of deepwater sharks due to their late age-at-maturity  
461 despite their relatively small body size, and thus, the consequences related to their capture  
462 in developing deepwater fisheries.

463

464 Intrinsic sensitivity can be categorized as low, medium, or high, based on a number of traits  
465 that can include age-at-maturity, length-at-maturity, longevity, maximum body length,  
466 fecundity, reproductive strategy, and trophic level (Cheung, Pitcher, & Pauly, 2005;  
467 Georgeson et al., 2020; Musick, 1999). Data are not available for most shark and ray species  
468 for all these traits, therefore we can only use a few reliably available across all species.  
469 Oldfield et al. (2012) suggested that minimum age-at-maturity, reproductive strategy, and  
470 maximum body length were the three most important factors for sharks and rays,  
471 respectively. However, there have been considerable advances in comparative life history  
472 theory and it is clear that there are three dimensions to consider in this order of  
473 importance: maximum body length, speed of life traits (growth rate, age at maturity,  
474 maximum age), and reproductive output (Cortés, 2000; Juan-Jordá, Mosqueira, Freire, &  
475 Dulvy, 2013). Many of these traits are not commonly known for shark and ray species and  
476 surprisingly, reproductive output contributes little to the maximum intrinsic rate of  
477 population increase, except in sharks and rays with very low fecundity of typically fewer  
478 than five pups per year (Forrest & Walters, 2009; Pardo et al., 2016), therefore, fecundity is  
479 least useful in determining intrinsic sensitivity. Similarly, reproductive strategy would be a  
480 binary option, either egg-laying (oviparity) or giving birth to live young (viviparity), and  
481 without corresponding information on fecundity or the relationship to maximum intrinsic  
482 rate of population increase, would be difficult to directly compare. Finally, trophic level is  
483 widely available based on dietary analyses and was considered, however, due to limited  
484 species-specific data and the change in trophic level with ontogenetic dietary shifts, we did  
485 not include this as a variable when calculating intrinsic sensitivity (Bethea et al., 2007;  
486 Lucifora, García, Menni, Escalante, & Hozbor, 2009).

487

488 For our analyses, we used two traits to represent intrinsic sensitivity – generation length  
489 (the midpoint between age-at-maturity and maximum age) and maximum body length.  
490 Many of the shark and ray generation lengths reported in IUCN Red List Assessments are  
491 inferred or suspected from closely related species (65% of species considered by M-Risk;  
492 **Supplementary Information 2**). Thus, we categorised generation lengths into 5-year bins,  
493 such that species with longer generation lengths have higher intrinsic sensitivities. We  
494 scored our confidence in the generation length for each species based on whether it was  
495 species-specific and the range was within a 5-year bin (high confidence), range spanned  
496 multiple 5-year bins or was based on estimated life-history parameters (medium), or was  
497 inferred from a congener (low)(**Data S1**). There was a significant positive linear relationship  
498 between generation length and relative maximum body length (**Supplementary Information**  
499 **2**). However, when considering only species with high confidence generation lengths, there  
500 was no significant relationship (**Supplementary Information 2 - Figure 1**). This is likely a  
501 result of estimated generation lengths being scaled to maximum body length. We then  
502 included maximum body size as a second measure of intrinsic sensitivity, of which we could  
503 be confident in the species-specific values (**Figure 2**). Ideally, we would use maximum  
504 weight but there are few such measures for all species and we encourage their collection.  
505 Therefore, we used maximum linear dimension, derived from either maximum length or  
506 maximum disc width for some rays, and scored it such that the largest species (*Maximum*  
507 *size<sub>L</sub>*) of those we assessed was assigned the reference highest intrinsic sensitivity (i.e.,  
508 *Relative Size* = 100%) and the *Maximum size<sub>x</sub>* for each other species (*x*) was scaled as a  
509 percentage of the largest species (**Figure 2**):

$$\text{Equation 3: } \textit{Relative Size} = \left( \frac{\textit{Maximum size}_x}{\textit{Maximum size}_L} \right) * 100$$

510 We considered four groups of body morphologies because they are measured in different  
511 ways (sharks and shark-like rays, pelagic rays, classic rays, and ghost sharks), and took the  
512 largest species for each body morphology and assigned them at 100% *Relative Size*. Whale  
513 Shark and Basking Shark (*Cetorhinus maximus*) are outliers, measuring over 1,200 cm longer  
514 than the next largest species, therefore, we considered the White Shark (*Carcharodon*  
515 *carcharias*) for these calculations, which attains a maximum size of 640 cm. All these three  
516 shark species were assigned a *Relative Size* score of 100% for their maximum size. Intrinsic



517 sensitivity values in this paper are based on the larger project species list (**Data S1**), rather  
518 than just those species within this paper to ensure that *Relative Size* is conserved. Both  
519 intrinsic sensitivity scores (*Relative GL* and *Relative Size*) were averaged for an overall  
520 intrinsic sensitivity (*IS*) score (**Figure 2**):

$$\text{Equation 4: } \textit{Intrinsic Sensitivity} = \frac{(\textit{Relative Size} + \textit{Relative GL})}{2}$$

521 It is not possible for a species to receive an intrinsic sensitivity score of 0% because all  
522 species are intrinsically at risk, even if the risk is small.

523

524 The intrinsic sensitivity (*IS*) was then divided by the management assessment score to attain  
525 a final M-Risk vulnerability score for each species within each management unit they are  
526 assessed:

$$\text{Equation 5: } \textit{Vulnerability} = \left( \frac{\textit{Intrinsic Sensitivity} * \textit{Exposure}}{\textit{Management}} \right)$$

527 As species exposure to each fishery is difficult to measure, we assume that Exposure = 1 as  
528 assessments are only performed on species that are caught or directly affected by the  
529 fishery in question. This is the maximum possible exposure and is consistent with the  
530 precautionary principle. For countries, there are 19 attribute scores (*A*) with a maximum  
531 possible score for each attribute of *Max.A*, and weighting (*W*), therefore, the formula to  
532 calculate the M-Risk score is:

$$\text{Equation 6: } \textit{Vulnerability} = \frac{\left( \frac{(\textit{Maximum size}_x * 100) + \textit{Relative GL}}{\textit{Maximum size}_L} \right)}{\sum_{n=1}^{19} \left( W_n \left[ \frac{A_n}{\textit{Max. } A_n} \right] * 100 \right)}$$

533 We have weighted all attributes equally (*W* = 1) so the bottom of equation 6 simplifies to  
534 the total points scored over the total possible points. The final M-Risk formula simplifies to:

$$\text{Equation 7: } \textit{Vulnerability} = \left( \frac{\textit{Intrinsic Sensitivity}}{\textit{Management}} \right)$$

535

### 536 **3. APPLYING THE M-RISK FRAMEWORK**

537 To explore the application of the M-Risk, we applied our criteria to two case studies, one  
538 country (Ecuador), and one RFMO (Inter-American Tropical Tuna Commission, IATTC).

539

### 540 **3.1 Case Studies: Country and RFMO for Management Assessments**

541 We completed assessments for all species that occur within two management units in order  
542 to determine the efficacy of our management-risk assessment framework; one country  
543 (Ecuador) and one RFMO (Inter-American Tropical Tuna Commission, IATTC). These  
544 assessments were completed for 35 species in Ecuador (23 sharks, 12 rays) and 27 species in  
545 the IATTC (20 sharks, 7 rays).

546

#### 547 **3.1.1 Case Study 1: Ecuador**

##### 548 **3.1.1.1 Information Sources**

549 We searched Google and Google Scholar in both English and Spanish for the following four  
550 elements in sequence: (i) Ecuadorian fisheries regulations, (ii) specific attribute keywords  
551 (i.e., “Ecuador shark finning regulations”), (iii) species name (English, Ecuadorian, Spanish,  
552 and Latin binomial) and “Ecuador fishery”, and (iv) species name in all relevant languages  
553 and specific attribute keywords (i.e., “Ecuador Whale Shark catch limits”) as has been done  
554 previously in ecological risk assessments (Cortés et al., 2010). Ten of the attributes were  
555 fishery-specific and did not require steps iii and iv. All attributes were scored on the most  
556 current publicly available information. We acknowledge, however, that in some cases this  
557 information may be out-of-date, and the most recent regulations are not available online. In  
558 cases where no information was available, the precautionary approach was applied, and it  
559 was concluded that there were no regulations related to the species in question and a score  
560 of zero was given. Again, we acknowledge that this information may exist, but we were  
561 unable to access due to it not being publicly available or readily accessible. For this reason,  
562 we do not consider uncertainty surrounding scores as exhaustive searches were completed  
563 and our framework was developed with the intent to reward transparency, i.e., if we  
564 couldn’t find the information in a reasonable amount of time then this was regarded as  
565 problematic reflecting lower levels of transparency and availability and thus scored as a  
566 zero. The point is that knowledge that exists somewhere, but is not available, is not likely  
567 helpful to management or transparency.

568

569 Four primary resources were used to complete the Ecuador management risk assessments:  
570 (1) Ecuador’s National Fisheries Institute website ([www.institutopesca.gob.ec](http://www.institutopesca.gob.ec)), (2) Ministry  
571 of Aquaculture and Fisheries website ([acuaculturaypesca.gob.ec](http://acuaculturaypesca.gob.ec)), (3) the Ecuador Law

572 website ([www.derechoecuador.com](http://www.derechoecuador.com)), and (4) a paper by Martínez-Ortiz et al. (2015)  
573 describing enforcement measures and species-specific catch data. Although multiple  
574 fisheries exist in Ecuador, two were chosen to be representative of their management. The  
575 Large Pelagic Artisanal Fishery was selected as it accounted for ~93% of shark and ray catch  
576 in Ecuador (Alava, Lindop, & Jacquet, 2015). The only exception was for the Whale Shark as  
577 there is common interaction between this species and purse-seine vessels that does not  
578 exist with other species, thus the Purse Seine Fishery was chosen to assess Whale Shark  
579 management in Ecuador (Dagorn, Holland, Restrepo, & Moreno, 2013; Rowat & Brooks,  
580 2012).

581

### 582 **3.1.1.2 Management Assessment Results**

583 Management assessment scores from all 35 species ranged from 53 to 68% of the ideal  
584 score. One species (Whale Shark) received the highest score of 68%, five species (3 sharks, 2  
585 rays) scored 67%, and the final 29 species (19 sharks, 10 rays) scored 53 to 62% (**Figure 3a**;  
586 **Table S1**). The differences in management scores were mainly due to three attributes: (1)  
587 landing limits, (2) post-release survival, and (3) catch reporting. Scores for the landing limits  
588 attribute ranged from 0 to 3 (the highest score possible), while post-release survival had  
589 range of 0 to 2 (out of a possible 3) and catch reporting ranged from 1 to 4 (out of 4). The  
590 scores for the remaining 16 attributes were the same across all species in the Large Pelagic  
591 Artisanal Fishery.

592

### 593 **3.1.1.3 Management Assessment Discussion**

594 There was little connection between the IUCN status and M-Risk scores with threatened  
595 species included in both higher and lower scoring groups. Almost all species with higher  
596 scores are listed on both CITES and CMS appendices, indicating clear progress for listed  
597 species. All species listed on CITES prior to 2014 were included in the higher scoring group.  
598 Eight CITES and nine CMS-listed species were in the lower scoring group, indicating it takes  
599 some time to implement regulations relating to these agreements. This has been seen in  
600 other CITES-listed species, like seahorses, which were listed on CITES in 2002, however,  
601 Thailand continued exporting high numbers without a positive Non-Detriment Finding until  
602 2016 (Kuo, Laksanawimol, Aylesworth, Foster, & Vincent, 2018). What was more likely to  
603 determine a higher score was species charisma. Charismatic species likely to be of high

604 tourism interest are often subject to increased conservation efforts (Albert, Luque, &  
605 Courchamp, 2018; Hausmann, Slotow, Fraser, & Di Minin, 2016; McClenachan, Cooper,  
606 Carpenter, & Dulvy, 2011), whereas a very large fraction of highly threatened species can go  
607 unstudied and unmanaged (Guy et al., 2021). This was apparent in the scores in Ecuador, as  
608 all species in the higher scoring group had some type of retention ban or catch limit (**Table**  
609 **S1**). These limits, in addition to CITES and CMS compliance, were likely placed to protect  
610 tourism value and public perception.

611

### 612 **3.1.2 Case Study 2: IATTC**

#### 613 **3.1.2.1 Information Sources**

614 Like assessments for Ecuador, we searched Google and Google Scholar for the same four  
615 elements: (i) IATTC fisheries regulations, (ii) specific attribute keywords, (iii) species name  
616 (English and Latin binomial), and (iv) species name and specific attribute keywords. For  
617 these assessments, we scored both the purse seine and the longline regulations, and the  
618 higher score was used. We used one primary and three secondary resources to complete  
619 the IATTC management risk assessments. Primarily, we used the IATTC website  
620 ([www.iattc.org](http://www.iattc.org)), which provided in-depth documents related to management regulations  
621 and fishery knowledge. Additionally, we found information from: (1) the Food and  
622 Agriculture Organization of the United Nations website ([www.fao.org](http://www.fao.org)), (2) the National  
623 Oceanic and Atmospheric Agency website ([www.noaa.gov](http://www.noaa.gov)), and (3) the International  
624 Scientific Committee for Tuna and Tuna-like Species in the North Pacific Ocean website  
625 ([isc.fra.go.jp](http://isc.fra.go.jp)).

626

#### 627 **3.1.2.2 Management Assessment Results**

628 Scores from the 27 species assessed ranged from 46–71% of an ideal score in the IATTC,  
629 with an average score of 58.3% (**Figure 3b; Table S1**). A single species, the Silky Shark  
630 (*Carcharhinus falciformis*), stood out with the highest score (71%). Three species, the Pelagic  
631 Stingray (*Pteroplatytrygon violacea*) and two eagle ray species (*Aetobatus laticeps* and *A.*  
632 *ocellatus*) both had scores of 50% or lower (50, 46 and 46%, respectively) and 14 of the 27  
633 species scored between 50-59% (**Figure 3b; Table S1**). Catch reporting was the attribute  
634 with the lowest scores for the IATTC because half of the species were only reported to  
635 broad taxonomic categories (i.e., “sharks” or “rays”). Only six species assessed had any form

636 of landing limits in place (Silky Shark, Oceanic Whitetip Shark (*Carcharhinus longimanus*),  
637 Giant Manta Ray (*Mobula birostris*), and devil rays (*Mobula mobular*, *M. munkiana*, and *M.*  
638 *thurstoni*), while the rest were only *recommended* to be released once caught. These results  
639 show that overall, the IATTC has species-specific regulations in place for only a select few  
640 species and the others are subject to marginal management applicable to elasmobranchs. It  
641 remains unclear whether these measures can significantly reduce fishing mortality and if the  
642 management focus is on the species that are most at-risk to overfishing within the fishery.

643

### 644 **3.1.2.3 Management Assessment Discussion**

645 Within the IATTC, there does not appear to be any relationship between global IUCN status  
646 and the management assessment scores. Of the 27 species assessed, only five are not  
647 currently listed in a threatened category, yet these are not the five with the lowest scores.  
648 Similarly, CITES and CMS listings appear to have not had any bearing on the management  
649 assessment scores. The Whale Shark has been listed on both CITES (2003) and CMS (App I in  
650 2017, App II in 1999) for much longer than many other sharks and rays and is  
651 unquestionably one of the most charismatic species, which we would expect to lead to a  
652 higher management score. However, it received a score of only 55% in the IATTC. The score  
653 may be lower than expected as there is little interaction between the fishery and whale  
654 sharks, thus lesser concern to provide specific legislation for this species. Additionally,  
655 where interactions do occur, there is a prohibition on setting nets when a whale shark is  
656 sighted (Inter-American Tropical Tuna Commission, 2019). The Silky Shark, which has been  
657 more recently listed on both CITES (2017) and CMS (2014) appendices, received the highest  
658 score of all species assessed. This surprisingly rapid management response may be due to  
659 the large amount of recent attention and market pressure to reduce the plight of Silky Shark  
660 caught in fish aggregating devices (FADs) and their susceptibility to purse seines (Duffy et  
661 al., 2015; Filmalter, Capello, Deneubourg, Cowley, & Dagorn, 2013; Hutchinson, Itano, Muir,  
662 & Holland, 2015). Although the purse-seine tuna fishery catches mostly shark 'bycatch',  
663 there are several pelagic ray species caught within the fishery. Although CITES listing may  
664 not necessarily be considered by RFMOs when discussing regulations, it should be. CITES is a  
665 legally binding agreement which covers relevant issues like 'Introduction From the Sea',  
666 including the high seas that constitute the fishing grounds plied by vessels operating under  
667 RFMOs, and countries' responsibilities for legal chain of custody when CITES-listed species

668 are landed from high seas vessels (Pavitt et al., 2021). With the exception of manta and  
669 devil rays, which are no-retention species (Inter-American Tropical Tuna Commission, 2015),  
670 there are no ray-specific regulations to reduce their catch. While shark species benefit from  
671 more generic legislation including the prohibition of shark lines (which intentionally catch  
672 sharks as retained bycatch), a code of practice to increase post-release survival, and fin-to-  
673 meat landing ratios to reduce finning, rays are not afforded any additional regulations  
674 (Inter-American Tropical Tuna Commission, 2005, 2016). In order to decrease management  
675 risk for elasmobranch species in the IATTC, implementing science-based landing limits for  
676 the most commonly caught species and including more legislation to evaluate and reduce  
677 ray fishing and post-release morality are recommended.

678

### 679 **3.2 Final M-Risk Scores**

680 The final M-Risk score for a species shows whether the current management is appropriate  
681 based on its intrinsic sensitivity (IS). Species with high intrinsic sensitivity will need higher  
682 management assessment scores to achieve a similar M-Risk score to lower IS species. As an  
683 example, the Great Hammerhead (*Sphyrna mokarran*) has a generation length of 24.8 years  
684 for a *Relative GL* score of 80% and reaches a maximum size of 610 cm total length, which is  
685 95.3% of the maximum sized shark (White Shark – 640 cm), therefore, the combined  
686 intrinsic sensitivity score for Great Hammerhead is 87.7% (**Figure 2; Table S1**). Compared to  
687 the Pelagic Stingray (*Pteroplatytrygon violacea*), which has a generation length of 6.5 years  
688 (*Relative GL* of 20%) and reaches a maximum size of 90 cm disc width, which is 34.6% of the  
689 maximum sized classic ray (Spiny Butterfly Ray, *Gymnura altavela* – 260 cm), therefore, the  
690 combined intrinsic sensitivity score for Pelagic Stingray is 27.3%. Although both the Great  
691 Hammerhead and Pelagic Stingray received similar scores in their management assessments  
692 for both Ecuador and the IATTC, when combined with their intrinsic sensitivity scores, the  
693 final Vulnerability is vastly different. The Great Hammerhead is vastly undermanaged for its  
694 life history compared to the Pelagic Stingray (**Figure 3; Table S1**). Although the Pelagic  
695 Stingray scored lower in the management assessment for the IATTC than the Great  
696 Hammerhead (50.0% and 58.9%, respectively), the final M-Risk scores show it is almost one-  
697 third at risk due to undermanagement in the IATTC than the Great Hammerhead due to its  
698 lower intrinsic sensitivity (M-Risk scores of 0.51 and 1.50, respectively). In Ecuador, the  
699 Pelagic Stingray is similarly approximately one-third as at-risk compared to Great

700 Hammerhead (0.55 and 1.49, respectively). These scores describe the true risk to  
701 undermanagement by each of these species based on our current understanding of these  
702 species and their populations.

703

#### 704 **4. DISCUSSION**

705 Here, we presented a framework for a management risk assessment (M-Risk) that is  
706 designed: (1) for assessing different management approaches for individual species *within* a  
707 management unit (of country or RFMO), (2) for comparing the efficacy of shark and ray  
708 management *across* different management units globally, and (3) for comparing  
709 management efficacy of a single species in all management units it is found. We also  
710 summarise the two main findings from this proof-of-concept. Firstly, different shark and ray  
711 species within a single management unit have management assessment scores that range  
712 from ~50-70% of a score that would be consistent with the 'ideal' management in the two  
713 fisheries assessed (Ecuador and the IATTC). Second, when accounting for species' intrinsic  
714 sensitivities, the final M-Risk scores (Vulnerability in Equation 5) best show which species  
715 are most at risk due to management deficiencies.

716

717 Intrinsic sensitivity of each species is important and particularly beneficial to our  
718 understanding of risk differences for species caught in poorly managed fisheries that have  
719 low intrinsic sensitivity, compared to high-risk species in adequately managed fisheries.  
720 Incorporating species-specific sensitivities to this analysis shows the nuance of managing  
721 sharks and rays, which are frequently viewed as a large group with similar attributes. With  
722 this approach, the difficulty of having good management for higher risk species is  
723 demonstrated as those with high intrinsic sensitivity scores will always have a higher final  
724 M-Risk score than species with lower intrinsic sensitivities. Upon completion of a wider  
725 array of countries with varying management regimes, we will be able to better assign final  
726 M-Risk scores to either low, medium, or high-risk groupings. This will provide an  
727 understanding and priority setting for which species, in which management units, are most  
728 at risk of overexploitation and at what M-Risk score intervention should begin. Additionally,  
729 after more management units are scored, we will evaluate the strength of pairwise  
730 correlations between attribute scores and/or country and species traits. This will allow us to  
731 ask questions such as, "do countries with higher Human Development Indices always score

732 higher in the ‘Country Attributes’?” and “in fisheries with a high score in the Catch  
733 Validation attribute, do they always receive a high score for Enforcement Methods?” The  
734 answers to these questions may uncover causal relationships that provide clear paths to  
735 improving fisheries management. Next, we explore the differences in scores *across*  
736 management units, how our M-Risk approach compares to other PSAs, and future directions  
737 for this work.

738

739 Two management units (IATTC and Ecuador) were assessed using the M-Risk framework.  
740 Once additional management units are assessed, countries will be compared to other  
741 countries and RFMOs can all be compared to one another. In describing the applications of  
742 this risk assessment framework, this discussion will assume these two management units  
743 are directly comparable. Despite both receiving similar scores for species in their respective  
744 jurisdictions, the scores for specific attribute categories differed. For example, the IATTC  
745 species, on average, scored 30% higher in the “Management System” attributes than  
746 species in Ecuador (73% and 44%, respectively). However, in the “Fishing Practices and  
747 Catch” attributes, species in Ecuador scored, on average, 20% higher than those in the IATTC  
748 (59% and 37%, respectively; **Figure 3; Table S1**). Based on these results, each management  
749 unit could benefit from studying regulations in the other to improve their own shark and ray  
750 management. Comparing management units using the same framework not only enables a  
751 level playing field, but also allows for management units with lower scores to more easily  
752 identify areas to improve their management efficacy. Management units lacking sufficient  
753 funding to complete their own fisheries research into which regulations have the greatest  
754 impact on shark and ray fishing mortality can learn from or borrow legislation from those  
755 with highly effective management strategies. This can also apply to sections of management  
756 that are lacking in sufficient shark and ray management. If adopted, this would increase the  
757 efficacy of global fisheries management for sharks and rays overall. A limitation of this type  
758 of assessment is it does not consider compliance with legislation. This includes compliance  
759 by the fishers, fisheries officers, and managers who are policing the regulations and  
760 assumes countries are meeting their obligations to agreements to which they are  
761 signatories, including CITES and for RFMOs. Without effective compliance and enforcement  
762 of the fisheries regulations, the management scores we have assigned for each fishery are a  
763 best-case scenario and likely over-estimate the management effectiveness. Since these



764 assessments are intended to be completed by external assessors using publicly available  
765 data, the scores should be considered minimum possible scores for each management unit  
766 if all regulations are not readily available online and consequently, our approach is  
767 precautionary.

768

769 Future directions for the M-Risk framework may include a capacity to weight attributes and  
770 include an evaluation of the exposure component. For this global comparison, weighting  
771 attributes is not appropriate as the goal is to compare across all fishery types, gears,  
772 countries, etc. For example, in Bangladesh the commercial and artisanal sectors operate  
773 with different goals and budgets and in different areas (Islam et al., 2017; Kumar et al.,  
774 2019). Therefore, an attribute that may be weighted higher for assessing the commercial  
775 fisheries may not make sense to be weighted that way when assessing subsistence fisheries.  
776 There are methods available to assign post-hoc weightings to attributes that remove the  
777 subjectivity of determining “importance” (Chen, 2019). Post-hoc weighting of attributes may  
778 be applied when using the management assessment framework to suit a particular goal.  
779 However, as the framework is designed for ongoing use, post-hoc weightings may continue  
780 to change as more assessments are completed. In our current assessments, exposure has  
781 been treated as a binary variable, despite normally ranging from 0–1, because we are  
782 assessing species in trade, therefore, they are assumed to be highly exposed. However, if  
783 information about the fishing grounds and depths of species becomes easier to acquire,  
784 there is potential to include exposure in future M-Risk work. Additionally, this framework  
785 does not consider cumulative impacts due to multiple fisheries or threats, including climate  
786 change, environmental modifications and other anthropogenic hazards, that may  
787 significantly increase overall risk to some species (Walker et al., 2021).

788

789 The results of this proof of concept provide a basis for further investigation of shark and ray  
790 management globally. With a larger number of management units assessed, we will have a  
791 better understanding of the efficacy of shark and ray management globally and which  
792 management units or species are most at risk due to undermanagement based on their  
793 intrinsic sensitivity. The M-Risk assessment tool may be a step to identify species-at-risk and  
794 appropriate management to implement that would lower risk to those species. Currently,  
795 international agreements like CITES and CMS are in place once species have been depleted.

796 However, identifying species-at-risk to overexploitation and implementing management to  
797 rebuild and achieve sustainable fisheries and avoid population collapses, may reduce the  
798 need for some species to be included in these international agreements in the first place as  
799 maintenance is simpler than recovery.

800

801

## 802 **ACKNOWLEDGEMENTS**

803 The authors thank Heather Patterson for her input of attributes and their scoring. We thank  
804 Thomasina Oldfield and Dulvy lab members for comments on manuscript drafts.  
805 Additionally, we would like to thank Ian Gregor for help with coding the graphs. We are  
806 grateful to the three reviewers and editor who provided valuable comments that improved  
807 this manuscript. This work was supported by a grant to GS from the Shark Conservation  
808 Fund, a philanthropic collaborative that pools expertise and resources to meet the threats  
809 facing the world's sharks and rays. The Shark Conservation Fund is a project of Rockefeller  
810 Philanthropy Advisors. NKD was supported by the Discovery and Accelerator grants from  
811 Natural Science and Engineering Research Council and the Canada Research Chair program.  
812 The authors have no conflicts of interest to declare.

813

## 814 **DATA AVAILABILITY STATEMENT**

815 Individual attribute scores for each species in each management unit, and the management  
816 documents used for scoring are available in the Supplementary Information (**Data S2** and  
817 **Data S3**, respectively).

818

819

820

821

822

823

824

825

826

827

828 **REFERENCES**

- 829 Agnew, D. J., Pearce, J., Pramod, G., Peatman, T., Watson, R., Beddington, J. R., & Pitcher, T.  
830 J. (2009). Estimating the worldwide extent of illegal fishing. *PLoS ONE*, *4*(2), e4570.  
831 doi:10.1371/journal.pone.0004570
- 832 Alava, J. J., Lindop, A., & Jacquet, J. (2015). *Marine fisheries catch reconstructions for*  
833 *continental Ecuador: 1950-2010*. Retrieved from Vancouver, British Columbia,  
834 Canada: doi:10.13140/2.1.1150.5447
- 835 Albert, C., Luque, G. M., & Courchamp, F. (2018). The twenty most charismatic species. *PLoS*  
836 *ONE*, *13*(7), e0199149. doi:10.1371/journal.pone.0199149
- 837 Allen Consulting Group. (2005). *Climate Change Risk and Vulnerability: Promoting an*  
838 *Efficient Adaptation Response in Australia*. Retrieved from Canberra, ACT:  
839 <http://www.sfrpc.com/Climate%20Change/4.pdf>
- 840 Allison, E. H., Perry, A. L., Badjeck, M.-C., Adger, W. N., Brown, K., Conway, D., . . . Dulvy, N.  
841 K. (2009). Vulnerability of national economies to the impacts of climate change on  
842 fisheries. *Fish and Fisheries*, *10*, 173-196. doi:10.1111/j.1467-2979.2008.00310.x
- 843 Amelot, M., Batsleer, J., Foucher, E., Girardin, R., Marchal, P., Poos, J. J., & Sys, K. (2021).  
844 Evidence of difference in landings and discards patterns in the English Channel and  
845 North Sea Rajidae complex fishery. *Fisheries Research*, *242*, 106028.  
846 doi:10.1016/j.fishres.2021.106028
- 847 Anderson, S. C., Branch, T. A., Ricard, D., & Lotze, H. K. (2012). Assessing global marine  
848 fishery status with a revised dynamic catch-based method and stock-assessment  
849 reference points. *ICES Journal of Marine Science*, *69*(8), 1491-1500.  
850 doi:10.1093/icesjms/fss105
- 851 Astles, K. L., Holloway, M. G., Steffe, A., Green, M., Ganassin, C., & Gibbs, P. J. (2006). An  
852 ecological method for qualitative risk assessment and its use in the management of  
853 fisheries in New South Wales, Australia. *Fisheries Research*, *82*, 290-303.  
854 doi:10.1016/j.fishres.2006.05.013
- 855 Begg, G. A., & Waldman, J. R. (1999). An holistic approach to fish stock identification.  
856 *Fisheries Research*, *43*(1-3), 35-44. doi:10.1016/S0165-7836(99)00065-X
- 857 Bethea, D. M., Hale, L., Carlson, J. K., Cortes, E., Manire, C. A., & Gelsleichter, J. (2007).  
858 Geographic and ontogenetic variation in the diet and daily ration of the bonnethead  
859 shark, *Sphyrna tiburo*, from the eastern Gulf of Mexico. *Marine Biology*, *152*(5),  
860 1009-1020.
- 861 Brander, K. (1981). Disappearance of common skate *Raja batis* from Irish Sea. *Nature*, *290*,  
862 48-49. doi:10.1038/290048a0
- 863 Brooks, E. N., Powers, J. E., & Cortés, E. (2010). Analytical reference points for age-  
864 structured models: application to data-poor fisheries. *ICES Journal of Marine Science*,  
865 *67*(1), 165-175. doi:10.1093/icesjms/fsp225
- 866 Cashion, M. S., Bailly, N., & Pauly, D. (2019). Official catch data underrepresent shark and  
867 ray taxa caught in Mediterranean and Black Sea fisheries. *Marine Policy*, *105*, 1-9.  
868 doi:10.1016/j.marpol.2019.02.041
- 869 Chen, C. T., Liu, K. M., & Joung, S. J. (1997). Preliminary report on Taiwan's whale shark  
870 fishery. *TRAFFIC Bulletin*, *17*(1), 53-57.
- 871 Chen, P. (2019). On the diversity-based weighting method for risk assessment and decision-  
872 making about natural hazards. *Entropy*, *21*, 269. doi:10.3390/e21030269

- 873 Cheung, W. W. L., Pitcher, T. J., & Pauly, D. (2005). A fuzzy logic expert system to estimate  
874 intrinsic extinction vulnerabilities of marine fishes to fishing. *Biological Conservation*,  
875 *124*(1), 97-111.
- 876 Chrysafi, A., & Kuparinen, A. (2015). Assessing abundance of populations with limited data:  
877 lessons learned from data-poor fisheries stock assessments. *Environmental Reviews*,  
878 *24*, 25-38. doi:[dx.doi.org/10.1139/er-2015-0044](https://doi.org/10.1139/er-2015-0044)
- 879 Cinner, J. E., Huchery, C., Hicks, C. C., Daw, T. M., Marshall, N., Wamukota, A., & Allison, E. H.  
880 (2015). Changes in adaptive capacity of Kenyan fishing community. *Nature Climate*  
881 *Change*, *5*, 872-877. doi:[10.1038/NCLIMATE2690](https://doi.org/10.1038/NCLIMATE2690)
- 882 Cope, J. M. (2013). Implementing a statistical catch-at-age model (Stock Synthesis) as a tool  
883 for deriving overfishing limits in data-limited situations. *Fisheries Research*, *142*, 3-  
884 14. doi:[10.1016/j.fishres.2012.03.006](https://doi.org/10.1016/j.fishres.2012.03.006)
- 885 Cope, J. M., & Punt, A. E. (2009). Length-based reference points for data-limited situations:  
886 applications and restrictions. *Marine and Coastal Fisheries: Dynamics, Management,*  
887 *and Ecosystem Science*, *1*, 169-186. doi:[10.1577/C08-025.1](https://doi.org/10.1577/C08-025.1)
- 888 Cortés, E. (2000). Life history patterns and correlations in sharks. *Reviews in Fisheries*  
889 *Science*, *8*(4), 299-344. doi:[10.1080/10408340308951115](https://doi.org/10.1080/10408340308951115)
- 890 Cortés, E., Arocha, F., Beerkircher, L., Carvalho, F., Domingo, A., Heupel, M., . . .  
891 Simpfendorfer, C. (2010). Ecological risk assessment of pelagic sharks caught in  
892 Atlantic pelagic longline fisheries. *Aquatic Living Resources*, *23*, 25-34.  
893 doi:[10.1051/alr/2009044](https://doi.org/10.1051/alr/2009044)
- 894 Cortés, E., Brooks, E. N., & Shertzer, K. W. (2015). Risk assessment of cartilaginous fish  
895 populations. *ICES Journal of Marine Science*, *72*(3), 1057-1068.  
896 doi:[10.1093/icesjms/fsu157](https://doi.org/10.1093/icesjms/fsu157)
- 897 Costello, C., Ovando, D., Hilborn, R., Gaines, S. D., Deschenes, O., & Lester, S. E. (2012).  
898 Status and solutions for the world's unassessed fisheries. *Science*, *338*, 517-520.  
899 doi:[10.1126/science.1223389](https://doi.org/10.1126/science.1223389)
- 900 Dagorn, L., Holland, K. N., Restrepo, V., & Moreno, G. (2013). Is it good or bad to fish with  
901 FADs? What are the real impacts of the use of drifting FADs on pelagic marine  
902 ecosystems? *Fish and Fisheries*, *14*(3), 391-415. doi:[10.1111/j.1467-](https://doi.org/10.1111/j.1467-2979.2012.00478.x)  
903 [2979.2012.00478.x](https://doi.org/10.1111/j.1467-2979.2012.00478.x)
- 904 Davidson, L. N. K., Krawchuk, M. A., & Dulvy, N. K. (2015). Why have global shark and ray  
905 landings declines: improved management or overfishing? *Fish and Fisheries*, *17*(2),  
906 438-458. doi:[10.1111/faf.12119](https://doi.org/10.1111/faf.12119)
- 907 Dent, F., & Clarke, S. (2015). *State of the global market for shark products* (590). Retrieved  
908 from [https://www.fao.org/in-action/globefish/publications/details-](https://www.fao.org/in-action/globefish/publications/details-publication/en/c/338282/)  
909 [publication/en/c/338282/](https://www.fao.org/in-action/globefish/publications/details-publication/en/c/338282/)
- 910 Dragičević, B., Dulčić, J., & Capapé, C. (2009). Capture of a rare shark, *Oxynotus centrina*  
911 (Chondrichthyes: Oxynotidae) in the eastern Adriatic Sea. *Journal of Applied*  
912 *Ichthyology*, *25*(1), 56-59. doi:[10.1111/j.1439-0426.2009.01265.x](https://doi.org/10.1111/j.1439-0426.2009.01265.x)
- 913 Duffy, L. M., Olson, R. J., Lennert-Cody, C. E., Galvan-Magana, F., Bocanegra-Castillo, N., &  
914 Kuhnert, P. M. (2015). Foraging ecology of silky sharks, *Carcharhinus falciformis*,  
915 captured by the tuna purse-seine fishery in the eastern Pacific Ocean. *Marine*  
916 *Biology*, *162*(3), 571-593. doi:[10.1007/s00227-014-2606-4](https://doi.org/10.1007/s00227-014-2606-4)
- 917 Dulvy, N., Reynolds, J. D., Pilling, G. M., Pinnegar, J. K., Scutt Phillips, J., Allison, E. H., &  
918 Badjeck, M.-C. (2011). Fisheries management and governance challenges in a climate

- 919 change. In *The Economics of Adapting Fisheries to Climate Change* (pp. 31-88). Paris,  
920 FR.: OECD Publishing.
- 921 Dulvy, N. K., Metcalfe, J. D., Glanville, J., Pawson, M. G., & Reynolds, J. D. (2000). Fishery  
922 stability, local extinctions, and shifts in community structure in skates. *Conservation*  
923 *Biology*, *14*(1), 283-293.
- 924 Dulvy, N. K., Pacoureau, N., Rigby, C. L., Pollom, R. A., Jabado, R. W., Ebert, D. A., . . .  
925 Simpfendorfer, C. A. (2021). Overfishing drives over one-third of all sharks and rays  
926 toward a global extinction crisis. *Current Biology*, *31*, 1-15.  
927 doi:10.1016/j.cub.2021.08.062
- 928 Dulvy, N. K., Simpfendorfer, C. A., Davidson, L. N. K., Fordham, S. V., Bräutigam, A., Sant, G.,  
929 & Welch, D. J. (2017). Challenges and priorities in shark and ray conservation.  
930 *Current Biology*, *27*, R565-R572. doi:10.1016/j.cub.2017.04.038
- 931 Ebert, D. A., Dando, M., & Fowler, S. (2021). *Sharks of the World* (2nd ed.). Princeton, New  
932 Jersey: Princeton University Press.
- 933 Enguehard, R. A., Devillers, R., & Hoerber, O. (2013). Comparing interactive and automated  
934 mapping systems for supporting fisheries enforcement activities - a case study on  
935 vessel monitoring systems (VMS). *Journal of Coastal Conservation*, *17*, 105-119.  
936 doi:10.1007/s11852-012-0222-3
- 937 FAO. (1999). *International Plan of Action for reducing incidental catch of seabirds in longline*  
938 *fisheries. International Plan of Action for the conservation and management of*  
939 *sharks. International Plan of Action for the management of fishing capacity.*  
940 Retrieved from Rome: <https://www.fao.org/3/x3170e/x3170e.pdf>
- 941 FAO. (2019). FishStatJ (Version 4.00.0). Rome: FAO.
- 942 FAO. (2020). *The State of World Fisheries and Aquaculture 2020. Sustainability in action.*  
943 Retrieved from Rome, Italy: <https://www.fao.org/documents/card/en/c/ca9229en/>
- 944 FAO. (2021). *ASFIS List of Species for Fisheries Statistics Purposes.* Retrieved from:  
945 <https://www.fao.org/fishery/collection/asfis/en>
- 946 Field, I. C., Meekan, M. G., Buckworth, R. C., & Bradshaw, C. J. A. (2009). Susceptibility of  
947 sharks, rays and chimaeras to global extinction. *Advances in Marine Biology*, *56*, 275-  
948 363. doi:10.1016/S0065-2881(09)56004-X
- 949 Filmlter, J. D., Capello, M., Deneubourg, J.-L., Cowley, P. D., & Dagorn, L. (2013). Looking  
950 behind the curtain: quantifying massive shark mortality in fish aggregating devices.  
951 *Frontiers in Ecology and the Environment*. doi:10.1890/130045
- 952 Fletcher, W. J. (2005). The application of qualitative risk assessment methodology to  
953 prioritize issues for fisheries management. *ICES Journal of Marine Science*, *62*, 1576-  
954 1587. doi:10.1016/j.icesjms.2005.06.005
- 955 Forrest, R. E., & Walters, C. J. (2009). Estimating thresholds to optimal harvest rate for long-  
956 lived, low-fecundity sharks accounting for selectivity and density dependence in  
957 recruitment. *Canadian Journal of Fishery and Aquatic Sciences*, *66*, 2062-2080.  
958 doi:10.1139/F09-137
- 959 Fowler, S., & Séret, B. (2010). *Shark fins in Europe: Implications for reforming the EU finning*  
960 *ban.* Retrieved from <http://eulasm.org/blog/shark-fins-europe-ban/>
- 961 Froese, R. (2004). Keep it simple: three indicators to deal with overfishing. *Fish and*  
962 *Fisheries*, *5*(1), 86-91. doi:10.1111/j.1467-2979.2004.00144.x
- 963 Froese, R., Zeller, D., Kleisner, K., & Pauly, D. (2012). What catch data can tell us about the  
964 status of global fisheries. *Marine Biology*, *159*, 1283-1292. doi:10.1007/s00227-012-  
965 1909-6

- 966 Georgeson, L., Rigby, C. L., Emery, T. J., Fuller, M., Hartog, H., Williams, A. J., . . . Nicol, S. J.  
967 (2020). Ecological risks of demersal fishing on deepwater chondrichthyan  
968 populations in the Southern Indian and South Pacific Oceans. *ICES Journal of Marine*  
969 *Science*, 77(5), 1711-1727. doi:10.1093/icesjms/fsaa019
- 970 Guan, L., Chen, Y., Boenish, R., Jin, X., & Shan, X. (2020). Improving data-limited stock  
971 assessment with sporadic stock index information in stock reduction analysis.  
972 *Canadian Journal of Fisheries and Aquatic Sciences*, 77, 857-868. doi:10.1139/cjfas-  
973 2018-0500
- 974 Guy, C. S., Cox, T. L., Williams, J. R., Brown, C. D., Eckelbecker, R. W., Glassic, H. C., . . .  
975 Siemiantkowski, M. J. (2021). A paradoxical knowledge gap in science for critically  
976 endangered fishes and game fishes during the sixth mass extinction. *Scientific*  
977 *Reports*, 11, 8447. doi:10.1038/s41598-021-87871-y
- 978 Hauck, M. (2008). Rethinking small-scale fisheries compliance. *Marine Policy*, 32, 635-642.  
979 doi:10.1016/j.marpol.2007.11.004
- 980 Hausmann, A., Slotow, R., Fraser, I., & Di Minin, E. (2016). Ecotourism marketing alternative  
981 to charismatic megafauna can also support biodiversity conservation. *Animal*  
982 *Conservation*, 20, 91-100. doi:10.1111/acv.12292
- 983 Heupel, M. R., Simpfendorfer, C. A., Espinoza, M., Smoothey, A. F., Tobin, A., & Peddemors,  
984 V. (2015). Conservation challenges of sharks with continental scale migrations.  
985 *Frontiers in Marine Science*, 2, 1-7. doi:10.3389/fmars.2015.00012
- 986 Hilborn, R., Branch, T. A., Ernst, B., Magnusson, A., Minte-Vera, C. V., Scheuerell, M. D., &  
987 Valero, J. L. (2003). State of the world's fisheries. *Annual Review of Environment and*  
988 *Resources*, 28, 359-399. doi:10.1146/annurev.energy.28.050302.105509
- 989 Hobday, A. J., Smith, A. D. M., Stobutzki, I. C., Bulman, C., Daley, R., Dambacher, J. M., . . .  
990 Zhou, S. (2011). Ecological risk assessment for the effects of fishing. *Fisheries*  
991 *Research*, 108(2-3), 372-384. doi:10.1016/j.fishres.2011.01.013
- 992 Hønneland, G. (1999). A model of compliance in fisheries: theoretical foundations and  
993 practical application. *Ocean & Coastal Management*, 42(8), 699-716.  
994 doi:10.1016/S0964-5691(99)00041-1
- 995 Hutchinson, M. R., Itano, D. G., Muir, J. A., & Holland, K. N. (2015). Post-release survival of  
996 juvenile silky sharks captured in a tropical tuna purse seine fishery. *Marine Ecology*  
997 *Progress Series*, 521, 143-154. doi:10.3354/meps11073
- 998 Inter-American Tropical Tuna Commission. (2005). *Resolution on the Conservation of Sharks*  
999 *Caught in Association with Fisheries in the Eastern Pacific Ocean*. (Resolution C-05-  
1000 03). Lanzarote, Spain: Inter-American Tropical Tuna Commission 73rd Meeting.
- 1001 Inter-American Tropical Tuna Commission. (2015). *Resolution on the Conservation of*  
1002 *Mobulid Rays Caught in Association With Fisheries in the IATTC Convention Area*.  
1003 (Regulation C-15-04). Guayaquil, Ecuador: Inter-American Tropical Tuna Commission  
1004 89th Meeting.
- 1005 Inter-American Tropical Tuna Commission. (2016). *Resolution on the Management of Shark*  
1006 *Species*. (Resolution C-16-05). La Jolla, California, USA: Inter-American Tropical Tuna  
1007 Commission 90th Meeting.
- 1008 Inter-American Tropical Tuna Commission. (2019). *Conservation of Whale Sharks*.  
1009 (Resolution C-19-06). Bilbao, Spain: Inter-American Tropical Tuna Commission 94th  
1010 Meeting.
- 1011 Islam, M. M., Shamsuzzaman, M. M., Mozumder, M. M. H., Xiangmin, X., Ming, Y., & Jewel,  
1012 M. A. S. (2017). Exploitation and conservation of coastal and marine fisheries in

- 1013 Bangladesh: do the fishery laws matter? *Marine Policy*, 76, 143-151.  
1014 doi:10.1016/j.marpol.2016.11.026
- 1015 Juan-Jordá, M. J., Mosqueira, I., Freire, J., & Dulvy, N. K. (2013). Life in 3-D: life history  
1016 strategies in tunas, mackerels and bonitos. *Reviews in Fish Biology & Fisheries*, 23,  
1017 135-155. doi:doi.org/10.1007/s11160-012-9284-4
- 1018 Juan-Jordá, M. J., Mosqueira, I., Freire, J., & Dulvy, N. K. (2015). Population declines of tuna  
1019 and relatives depend on their speed of life. *Proceedings of the Royal Society B*, 282,  
1020 20150322. doi:10.1098/rspb.2015.0322
- 1021 Juan-Jordá, M. J., Murua, H., Arrizabalaga, H., Dulvy, N. K., & Restrepo, V. (2018). Report  
1022 card on ecosystem-based fisheries management in tuna regional fisheries  
1023 management organizations. *Fish and Fisheries*, 19, 321-339. doi:10.1111/faf.12256
- 1024 Khan, A. M. A., Mill, A. C., Gray, T. S., Jiang, M., Arief, H., Brown, A., . . . Polunin, N. V. C.  
1025 (2020). Reliability of the data on tuna catches obtained from the dockside in  
1026 Indonesia: a study of stakeholders' perceptions. *Marine Policy*, 122, 104242.  
1027 doi:10.1016/j.marpol.2020.104242
- 1028 Kulka, D. W., Anderson, B., Cotton, C. F., Derrick, D., Pacoureaux, N., & Dulvy, N. K. (2020).  
1029 *Leucoraja ocellata*. *The IUCN Red List of Threatened Species*, 2020,  
1030 eT161631A124518400. doi:10.2305/IUCN.UK.2020-3.RLTS.T161631A124518400.en
- 1031 Kumar, U., Helen, A. M., Das, J., Parvez, M. S., Biswas, S. K., & Ray, S. (2019). Unraveling the  
1032 hidden truth in a poorly managed ecosystem: the case of discarded species of  
1033 conservation interest in Bangladesh industrial marine fisheries. *Regional Studies in*  
1034 *Marine Science*, 32, 100813. doi:10.1016/j.rsma.2019.100813
- 1035 Kuo, T.-C., Laksanawimol, P., Aylesworth, L., Foster, S. J., & Vincent, A. C. J. (2018). Changes  
1036 in the trade of bycatch species corresponding to CITES regulations: the case of dried  
1037 seahorse trade in Thailand. *Biodiversity and Conservation*, 27, 3447-3468.  
1038 doi:doi.org/10.1007/s10531-018-1610-2
- 1039 Lack, M., Sant, G., Burgener, M., & Okes, N. (2014). *Development of a rapid management-*  
1040 *risk assessment method for fish species through its application to sharks: framework*  
1041 *and results*. Retrieved from [https://www.cms.int/en/document/development-rapid-](https://www.cms.int/en/document/development-rapid-management-risk-assessment-method-fish-species-through-its-application-0)  
1042 [management-risk-assessment-method-fish-species-through-its-application-0](https://www.cms.int/en/document/development-rapid-management-risk-assessment-method-fish-species-through-its-application-0)
- 1043 Last, P. R., White, W. T., Carvalho, M. R. d., Séret, B., Stehmann, M. F. W., & Naylor, G. J. P.  
1044 (2016). *Rays of the World*. Australia: CSIRO Publishing.
- 1045 Lawson, J. M., Pollom, R. A., Gordon, C. A., Barker, J., Meyers, E. K. M., Zidowitz, H., . . .  
1046 Dulvy, N. K. (2020). Extinction risk and conservation of critically endangered angel  
1047 sharks in the Eastern Atlantic and Mediterranean Sea. *ICES Journal of Marine*  
1048 *Science*, 77(1), 12-29. doi:10.1093/icesjms/fsz222
- 1049 Le Quesne, W. J. F., & Jennings, S. (2012). Predicting species vulnerability with minimal data  
1050 to support rapid risk assessment of fishing impacts on biodiversity. *Journal of Applied*  
1051 *Ecology*, 49, 20-28. doi:10.1111/j.1365-2664.2011.02087.x
- 1052 Lee, T. M., & Jetz, W. (2011). Unravelling the structure of species extinction risk for  
1053 predictive conservation science. *Proceedings of the Royal Society B*, 278, 1329-1338.  
1054 doi:10.1098/rspb.2010.1877
- 1055 Lucifora, L. O., García, V. B., Menni, R. C., Escalante, A. H., & Hozbor, N. M. (2009). Effects of  
1056 body size, age and maturity stage on diet in a large shark: ecological and applied  
1057 implications. *Ecological Research*, 24, 109-118. doi:10.1007/s11284-008-0487-z

- 1058 Martínez-Ortiz, J., Aires-da-Silva, A. M., Lennert-Cody, C. E., & Maunder, M. N. (2015). The  
1059 Ecuadorian artisanal fishery for large pelagics: species composition and spatio-  
1060 temporal dynamics. *PLoS ONE*, *10*(8), e0135136. doi:10.1371/journal.pone.0135136  
1061 McClenachan, L., Cooper, A. B., Carpenter, K. E., & Dulvy, N. K. (2011). Extinction risk and  
1062 bottlenecks in the conservation of charismatic marine species. *Conservation Letters*,  
1063 *5*, 73-80. doi:10.1111/j.1755-263x.2011.00206.x  
1064 Melnychuk, M. C., Peterson, E., Elliott, M., & Hilborn, R. (2017). Fisheries management  
1065 impacts on target species status. *Proceedings of the National Academy of Science*,  
1066 *114*(1), 178-183. doi:10.1073/pnas.1609915114  
1067 Micheli, F., De Leo, G., Butner, C., Martone, R. G., & Shester, G. (2014). A risk-based  
1068 framework for assessing the cumulative impact of multiple fisheries. *Biological*  
1069 *Conservation*, *176*, 224-235. doi:10.1016/j.biocon.2014.05.031  
1070 Musick, J. A. (1999). Criteria to define extinction risk in marine fishes - The American  
1071 Fisheries Society initiative. *Fisheries*, *24*(12), 6-14. doi:10.1577/1548-  
1072 8446(1999)024<0006:CTDERI>2.0.CO;2  
1073 Musick, J. A., Burgess, G., Cailliet, G., Camhi, M., & Fordham, S. (2000). Management of  
1074 sharks and their relatives (Elasmobranchii). *Fisheries*, *25*(3), 9-13. doi:10.1577/1548-  
1075 8446(2000)025<0009:MOSATR>2.0.CO;2  
1076 Myers, R. A., & Worm, B. (2005). Extinction, survival or recovery of large predatory fishes.  
1077 *Philosophical Transactions of the Royal Society B-Biological Sciences*, *360*(1453), 13-  
1078 20. doi:10.1098/rstb.2004.1573  
1079 Okes, N., & Sant, G. (2022). Missing sharks: A country review of catch, trade and  
1080 management recommendations for CITES-listed shark species. In *Seventy-fourth*  
1081 *meeting of the Standing Committee* (pp. 39). Lyon, France: TRAFFIC.  
1082 Oldfield, T. E. E., Outhwaite, W., Goodman, G., & Sant, G. (2012). *Report on assessing the*  
1083 *intrinsic vulnerability of harvested sharks*. Retrieved from Bonn, Germany:  
1084 [https://www.cms.int/sharks/en/document/assessing-intrinsic-vulnerability-](https://www.cms.int/sharks/en/document/assessing-intrinsic-vulnerability-harvested-sharks-submitted-uk-english-only)  
1085 [harvested-sharks-submitted-uk-english-only](https://www.cms.int/sharks/en/document/assessing-intrinsic-vulnerability-harvested-sharks-submitted-uk-english-only)  
1086 Pacoureau, N., Rigby, C. L., Kyne, P. M., Sherley, R. B., Winker, H., Carlson, J. K., . . . Dulvy, N.  
1087 K. (2021). Half a century of global decline in oceanic sharks and rays. *Nature*, *589*,  
1088 567-571. doi:10.1038/s41586-020-03173-9  
1089 Pardo, S. A., Cooper, A. B., Reynolds, J. D., & Dulvy, N. K. (2018). Quantifying the known  
1090 unknowns: estimating maximum intrinsic rate of population increase in the face of  
1091 uncertainty. *ICES Journal of Marine Science*, *75*(3), 953-963.  
1092 doi:10.1093/icesjms/fsx220  
1093 Pardo, S. A., Kindsvater, H. K., Reynolds, J. D., & Dulvy, N. K. (2016). Maximum intrinsic rate  
1094 of population increase in sharks, rays, and chimaeras: the importance of survival to  
1095 maturity. *Canadian Journal of Fisheries and Aquatic Sciences*, *73*(8), 1159-1163.  
1096 doi:10.1139/cjfas-2016-0069  
1097 Pauly, D., & Zeller, D. (2016). Catch reconstructions reveal that global marine fisheries  
1098 catches are higher than reported and declining. *Nature Communications*, *7*, 10244.  
1099 doi:10.1038/ncomms10244  
1100 Pauly, D., Zeller, D., & Palomares, M. L. D. (2021). Sea Around Us Concepts, Design and Data.  
1101 Retrieved from <http://seararoundus.org>  
1102 Pavitt, A., Malsch, K., King, E., Chevalier, A., Kachelriess, D., Vannuccini, S., & Friedman, K.  
1103 (2021). *CITES and the sea: Trade in commercially exploited CITES-listed marine*  
1104 *species*. Retrieved from Rome:



- 1105 Peterson, C. D., Belcher, C. N., Bethea, D. M., Driggers III, W. B., Frazier, B. S., & Latour, R. J.  
1106 (2017). Preliminary recovery of coastal sharks in the south-east United States. *Fish*  
1107 *and Fisheries*, 18, 845-859. doi:10.1111/faf.12210
- 1108 Price, E., Melville-Smith, R., King, D., Green, T., Dixon, W., Lambert, S., & Spencer, T. (2016).  
1109 *Measurement of Fisheries Compliance Outcomes: A Preliminary National Study*.  
1110 Perth, Australia: Fisheries Research and Development Corporation Retrieved from  
1111 [http://www.fish.wa.gov.au/Documents/research\\_reports/fr275.pdf](http://www.fish.wa.gov.au/Documents/research_reports/fr275.pdf).
- 1112 RAM Legacy Stock Assessment Database. (2021). *Extended RAM Legacy Stock Assessment*  
1113 *Database version 4.493 (v4.493) [Data set]*. Retrieved from:  
1114 <https://doi.org/10.5281/zenodo.4458275>
- 1115 Reynolds, J. D., Dulvy, N. K., Goodwin, N. B., & Hutchings, J. A. (2005). Biology of extinction  
1116 risk in marine fishes. *Proceedings of the Royal Society B-Biological Sciences*,  
1117 272(1579), 2337-2344. doi:10.1098/rspb.2005.3281
- 1118 Ricard, D., Minto, C., Jensen, O. P., & Baum, J. K. (2012). Examining the knowledge base and  
1119 status of commercially exploited marine species with the RAM Legacy Stock  
1120 Assessment Database. *Fish and Fisheries*, 13, 380-398. doi:10.1111/j.1467-  
1121 2979.2011.00435.x
- 1122 Rigby, C., & Simpfendorfer, C. A. (2015). Patterns in life history traits of deep-water  
1123 chondrichthyans. *Deep Sea Research Part II: Topical Studies in Oceanography*, 115,  
1124 30-40. doi:10.1016/j.dsr2.2013.09.004
- 1125 Rousseau, Y., Watson, R. A., Blanchard, J. L., & Fulton, E. A. (2019). Evolution of global  
1126 marine fishing fleets and the response of fished resources. *Proceedings of the*  
1127 *National Academy of Science*, 116(25), 12238-12243. doi:10.1073/pnas.1820344116
- 1128 Rowat, D., & Brooks, K. S. (2012). A review of the biology, fisheries and conservation of the  
1129 whale shark *Rhincodon typus*. *Journal of Fish Biology*, 80(5), 1019-1056.  
1130 doi:10.1111/j.1095-8649.2012.03252.x
- 1131 Rowlands, G., Brown, J., Soule, B., Boluda, P. T., & Rogers, A. D. (2019). Satellite surveillance  
1132 of fishing vessel activity in the Ascension Island Exclusive Economic Zone and Marine  
1133 Protected Area. *Marine Policy*, 101, 39-50. doi:10.1016/j.marpol.2018.11.006
- 1134 Ruano-Chamorro, C., Subida, M. D., & Fernández, M. (2017). Fishers' perception: an  
1135 alternative source of information to assess the data-poor benthic small-scale  
1136 artisanal fisheries of central Chile. *Ocean and Coastal Management*, 146, 67-76.  
1137 doi:10.1016/j.ocecoaman.2017.06.007
- 1138 Schindler, D. E., Hilborn, R., Chasco, B., Boatright, C. P., Quinn, T. P., Rogers, L. A., &  
1139 Webster, M. S. (2010). Population diversity and the portfolio effect in an exploited  
1140 species. *Nature*, 465, 609-612. doi:<https://doi.org/10.1038/nature09060>
- 1141 Sellas, A. B., Bassos-Hull, K., Perez-Jimenez, J. C., Angulo-Valdes, J. A., Bernal, M. A., &  
1142 Hueter, R. E. (2015). Population structure and seasonal migration of the spotted  
1143 eagle ray, *Aetobatus narinari*. *Journal of Heredity*, 106(3), 266-275.  
1144 doi:10.1093/jhered/esv011
- 1145 Simpfendorfer, C. A., & Dulvy, N. K. (2017). Bright spots of sustainable shark fishing. *Current*  
1146 *Biology*, 27, R83-R102. doi:10.1016/j.cub.2016.12.017
- 1147 Stevens, J. D., Bonfil, R., Dulvy, N. K., & Walker, P. A. (2000). The effects of fishing on sharks,  
1148 rays, and chimaeras (chondrichthyans), and the implications for marine ecosystems.  
1149 *ICES Journal of Marine Science*, 57, 476-494. doi:10.1006/jmsc.2000.0724
- 1150 Stevens, J. D., Walker, T. I., & Simpfendorfer, C. A. (1997). Are southern Australian shark  
1151 fisheries sustainable? In D. A. Hancock, D. C. Smith, A. Grant, & J. P. Beumer (Eds.),

- 1152            *Developing and Sustaining World Fisheries Resources. The State of Science and*  
1153            *Management*. Melbourne: CSIRO Publishing.
- 1154 Stobutzki, I., Miller, M., & Brewer, D. (2001). Sustainability of fishery bycatch: a process for  
1155            assessing highly diverse and numerous bycatch. *Environmental Conservation*, 28(2),  
1156            167-181. doi:10.1017/S0376892901000170
- 1157 Turner II, B. L., Kaspersen, R. E., Matson, P. A., McCarthy, J. J., Corell, R. W., Christensen, L., .  
1158            . . Schiller, A. (2003). A framework for vulnerability analysis in sustainability science.  
1159            *Proceedings of the National Academy of Science*, 100(14), 8074-8079.  
1160            doi:10.1073/pnas.1231335100
- 1161 Urquhart, J., Acott, T. G., Symes, D., & Zhao, M. (2014). Introduction: Social Issues in  
1162            Sustainable Fisheries Management. In J. Urquhart, T. G. Acott, D. Symes, & M. Zhao  
1163            (Eds.), *Social Issues in Sustainable Fisheries Management*. London, U.K.: Springer.
- 1164 Walker, T. I., Day, R. W., Awruch, C. A., Bell, J. D., Braccini, J. M., Dapp, D. R., . . . Reina, R. D.  
1165            (2021). Ecological vulnerability of the chondrichthyan fauna of southern Australia to  
1166            the stressors of climate change, fishing and other anthropogenic hazards. *Fish and*  
1167            *Fisheries*, 22, 1105-1135. doi:10.1111/faf.12571
- 1168 Williams, S. E., Shoo, L. P., Isaac, J. L., Hoffmann, A. A., & Langham, G. (2008). Towards an  
1169            integrated framework for assessing the vulnerability of species to climate change.  
1170            *PLoS Biology*, 6(12), e325. doi:10.1371/journal.pbio.0060325
- 1171 Woodhams, J., Peddemors, V., Braccini, M., Victorian Fisheries Authority, & Lyle, J. (2021).  
1172            *Gummy shark Mustelus antarcticus (2020)*. Retrieved from  
1173            <https://fish.gov.au/report/301-Gummy-Shark-2020>
- 1174 Zhou, S. J., Milton, D. A., & Fry, G. C. (2012). Integrated risk analysis for rare marine species  
1175            impacted by fishing: sustainability assessment and population trend modelling. *ICES*  
1176            *Journal of Marine Science*, 69(2), 271-280. doi:10.1093/icesjms/fss009
- 1177
- 1178
- 1179
- 1180
- 1181
- 1182
- 1183
- 1184
- 1185
- 1186
- 1187
- 1188
- 1189
- 1190
- 1191

1192 **Table 1.** The 21 M-Risk Attributes used for assessments. Universal attributes are indicated  
 1193 by a (U) and species-specific attributes are indicated by a (SP). For complete explanation and  
 1194 scoring of each attribute see **supplementary information 1.**

| <b>Attribute Class</b>             | <b>Question Posed by Attribute</b>                                                                        |
|------------------------------------|-----------------------------------------------------------------------------------------------------------|
| <b>Management System</b>           | Is there a regulatory body in place? (U)                                                                  |
|                                    | What permits are associated with the fishery? (U)                                                         |
|                                    | Is there a stock status or risk assessment performed for the species being assessed? (SP)                 |
|                                    | How is the sustainable fishing level for non-shark and ray target species determined? (U)                 |
|                                    | What efforts are in place to reduce incidental catch? (SP)                                                |
| <b>Fishing Practices and Catch</b> | What is the taxonomic resolution of landing limits? (SP)                                                  |
|                                    | How are finning and removal of other high-value products at sea dealt with? (SP)                          |
|                                    | Are there any seasonal closures? (SP)                                                                     |
|                                    | Are there any spatial closures? (SP)                                                                      |
|                                    | What measures are in place to increase post-release survival? (SP)                                        |
| <b>Compliance and Enforcement</b>  | What is the taxonomic resolution of the catch reported? (SP)                                              |
|                                    | How is illegal, unregulated, and unreported fishing handled? (U)                                          |
|                                    | What compliance measures are in place to reduce fishing mortality of non-target species? (SP)             |
|                                    | How is reported catch validated? (U)                                                                      |
|                                    | How are regulations enforced? (U)                                                                         |
| <b>Country Attributes</b>          | Is there a larger amount given for beneficial subsidies than for deleterious subsidies? (U)               |
|                                    | Does the country's NPOA-Sharks address the ten recommended objectives? (U)                                |
|                                    | Is the country a member of CITES without reservations on elasmobranch species? (SP)                       |
|                                    | Is the country a member of CMS and are they a signatory on the MOU-Sharks? (U)                            |
| <b>RFMO Attributes</b>             | Are all member countries also members of CITES and CMS with no reservations on elasmobranch species? (SP) |
|                                    | How well has the RFMO progressed with the implementation of ecosystem-based fisheries management? (U)     |

1195  
 1196  
 1197  
 1198  
 1199  
 1200  
 1201  
 1202  
 1203  
 1204

1205 **Table 2.** Example of value statements for the attribute that asks, “What is the taxonomic  
1206 resolution of the catch reported?”

| <b>Score</b> | <b>Value Statement</b>                                                                                                                             |
|--------------|----------------------------------------------------------------------------------------------------------------------------------------------------|
| 0            | No reporting of elasmobranch catch                                                                                                                 |
| 1            | Catch reporting to broad categories (i.e. “sharks” “elasmobranchs” or “rays”) OR list of species listed with no associated numbers of actual catch |
| 2            | Catch reporting to narrow categories (i.e. “mackerel sharks,” “reef sharks,” “deepwater sharks,” “whaler sharks,” etc.)                            |
| 3            | Catch reporting as similar/related species grouped (“deepwater dogfishes,” “gulper sharks,” “mako,” “hammerhead,” etc.)                            |
| 4            | Species-specific catch reporting                                                                                                                   |

1207

1208

1209

1210

1211

1212

1213

1214

1215

1216

1217

1218

1219

1220

1221

1222

1223

1224

1225

1226

1227

1228

1229

1230

1231 **FIGURE LEGENDS**

1232 **Figure 1.** The goal of M-Risk assessments is to determine relative species risk within and  
1233 across fisheries at country and RFMO scales. Whereas Productivity Susceptibility Analysis  
1234 (PSA) is applied to a specific assessment unit (i.e., typically the fishery), and hence it is not  
1235 typical to make comparisons among PSAs. PSAs identify Vulnerability based on a species'  
1236 attributes (Productivity) and its overlap with the fishery being assessed (Susceptibility). M-  
1237 Risk also identifies Vulnerability based on a species' attributes (albeit with a different name:  
1238 Intrinsic Sensitivity), however, this M-Risk is contingent on its management within the  
1239 fishery, not just spatial overlap with the fishery.

1240

1241 **Figure 2.** Intrinsic sensitivity (IS) scores based on generation length and maximum size.  
1242 Higher intrinsic sensitivities are assigned to sharks and rays with longer generation lengths  
1243 and larger relative sizes. Relative generation length is scored by bins (0-5 years = 0%, 5.1-10  
1244 = 20%, 10.1-15 = 40%, 15.1-20 = 60%, 20.1-25 = 80%, >25 = 100%).

1245

1246 **Figure 3.** All attribute scores, management scores, intrinsic sensitivity scores, and final M-  
1247 Risk scores for all species assessed in (a) Ecuador and (b) IATTC. Attribute columns are  
1248 arranged from highest average score to lowest average score within the management unit.  
1249 Final M-Risk scores are presented as the percentage of the highest score such that the  
1250 higher M-Risk scores represent the most at-risk species. No NA values are included in the  
1251 figure as only relevant attributes for each management unit are included.

1252

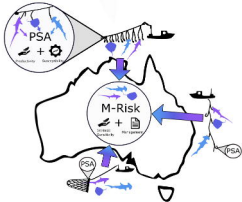

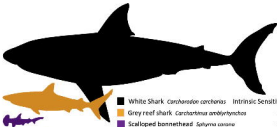

- White Shark *Carcharodon carcharias* Intrinsic Sensitivity = 100%
- Grey reef shark *Carcharhinus amblyrhynchos* IS = 39.92%
- Scalloped bonnethead *Sphyrna tiburo* IS = 17.18%

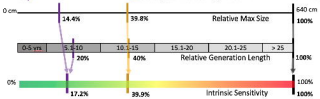

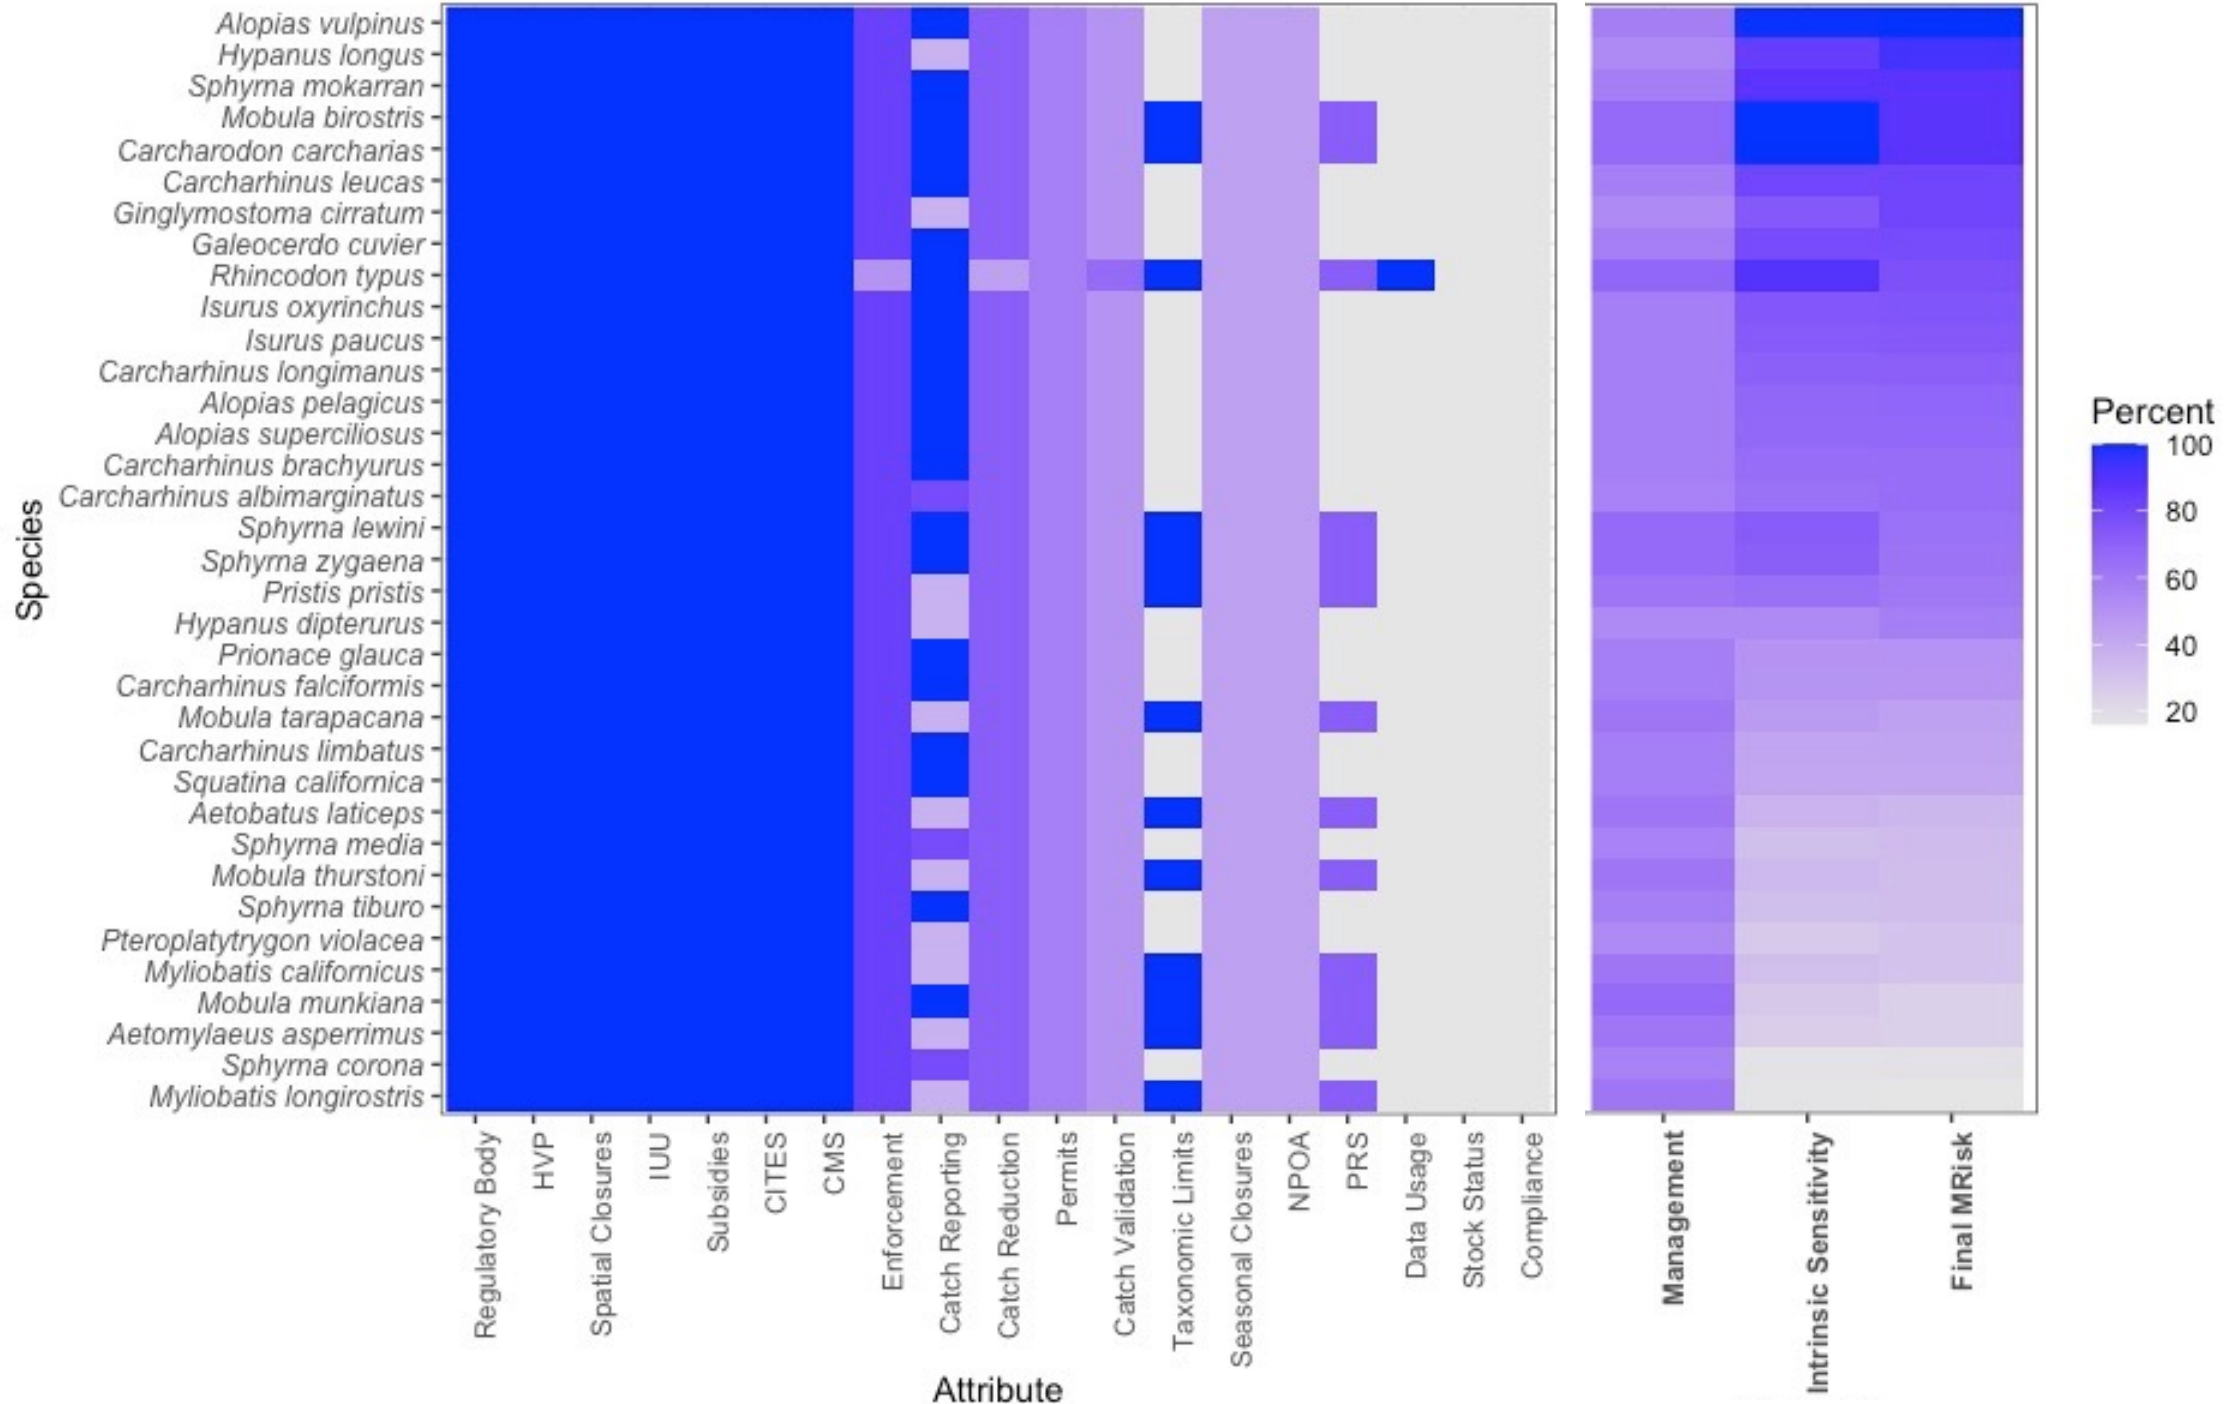

Source: https://www.biorxiv.org/content/10.1101/2022.05.29.493344v1.full.pdf
